# Supplementary material for: Measurement properties of selected patient-reported outcome measures for use in randomised controlled trials in patients with systemic lupus erythematosus: a systematic review
Source: PubMed Central journal article supplement — Lupus Sci Med. 2020 Jun 25;7(1):e000373. doi: 10.1136/lupus-2019-000373 (PMC7319706; doi:10.1136/lupus-2019-000373), 2020-06-25
Supplement: lupus-2019-000373supp001.pdf [file lupus-2019-000373supp001.pdf]

## APPENDIX

### A systematic review of Patient-Reported Outcome (PRO) Measures for Use in Randomized Controlled Trials (RCT) of Patients with Systemic Lupus Erythematosus (SLE)

Search Methods  
October 20, 2019

1. Search methods will include multiple methods to ensure a sensitive search of literature across geographical and discipline areas and to ensure that all applicable literature is found. These search methods include searching multiple databases, and citation searching of reference lists of included studies.

#### 1.1. Two Databases

The goal of the initial database searches is to capture the breadth of multidisciplinary literature. The databases to be included in this review are:

- Ovid Medline: the United States National Library of Medicine's (NLM) premier bibliographic database providing information from the following fields: medicine, nursing, dentistry, veterinary medicine, allied health and pre-clinical sciences
- Embase: a biomedical and pharmacological database containing bibliographic records with citations, abstracts and indexing derived from biomedical articles in peer reviewed journals, and is especially strong in its coverage of drug and pharmaceutical research. Better captures European literature.

#### 1.2 Search Terms

- Search terms:
  - **Appendix I** for Medline

— **Appendix II** for Embase

### 1.3 Search Parameters/Limiters

- Limiters will be added once all search terms (OR/AND) combined.
  - Articles written in English language (secondary to the language limitations of reviewers) and human studies only (secondary to the objective of the review)
- Searches will not be limited by age group or year (year up to date of search)
  - Searches will not be limited by “review;” reviews will be filtered out during screening/selection process. Related reviews will be noted and references will be checked for applicable included articles

### 1.4 Running database searches

- The literature searches will be completed by librarian/information specialist (EVIDERA Team), who has extensive experience in database searching and systematic reviews.
- The primary search will be done for Medline database and then altered as necessary for other databases.
- Searches will be tailored to each database based on the above terms.
- Copies of each search structure per database will be retained.
- The librarian will remove duplicates within and between databases
- Key articles (**Appendix III**) will be provided to validate the search developed by the librarian and to supplement the library with important literature

### 1.5 Citation search

- Using screening/selection process (**Appendix IV**)
- Title search will be completed by primary reviewer (Member of EVIDERA)
- Both reviewers will use independent-agreement process to screen/select abstracts and then full articles.

### 1.6 Hand Search reference lists of relevant recent reviews

- Described in **Appendix I-II**
- Using screening/selection process (**Appendix IV**)
- Title/abstract/full-article screening will be completed by primary reviewer (LE) to make list of any new included articles
- 2<sup>nd</sup> reviewer will check to see if any new included articles meet inclusion criteria

### Appendix 1: Search terms for Medline

| Friday, June 23, 2017 5:45:31 PM Database - MEDLINE Complete |                                                                                                                                                                      |           |
|--------------------------------------------------------------|----------------------------------------------------------------------------------------------------------------------------------------------------------------------|-----------|
| #                                                            | Query                                                                                                                                                                | Results   |
| S1                                                           | AB "systemic lupus erythematosus" OR MM "Lupus Erythematosus, Systemic" OR TI "systemic lupus erythematosus"                                                         | 54,488    |
| S2                                                           | PT "randomized controlled trial" OR "Randomized Controlled Trials as Topic" OR AB (rct OR random*) OR TI (rct OR random*)                                            | 1,075,153 |
| S3                                                           | AB (SF-36 OR SF36 OR "Short Form 36" OR "36 SF") OR TI (SF-36 OR SF36 OR "Short Form 36" OR "36 SF")                                                                 | 21,385    |
| S4                                                           | AB (Lupus-QOL OR "Lupus Quality of Life" OR LupusQOL) OR TI (Lupus-QOL OR "Lupus Quality of Life" OR LupusQOL)                                                       | 38        |
| S5                                                           | AB (FACIT-F OR ("Functional Assessment of Chronic Illness Therapy" AND Fatigue)) OR TI (FACIT-F OR ("Functional Assessment of Chronic Illness Therapy" AND Fatigue)) | 311       |
| S6                                                           | (S1 AND S2) AND (S3 OR S4 OR S5)                                                                                                                                     | 35        |
| S7                                                           | S6 AND DT 2015-2017 AND LA english AND PT "journal article"                                                                                                          | 8         |
| S8                                                           | PT "observational study" OR MH "Observational Studies as Topic" OR AB observational OR TI observational                                                              | 135,514   |
| S9                                                           | (S1 AND S8) AND (S3 OR S4 OR S5)                                                                                                                                     | 10        |

|            |                                                                                                                                              |           |
|------------|----------------------------------------------------------------------------------------------------------------------------------------------|-----------|
| <b>S10</b> | S9 AND DT 2015-2017 AND LA english AND PT "journal article"                                                                                  | 4         |
| <b>S11</b> | AB (validity OR validation OR development OR psychometric) OR TI (validity OR validation OR development OR psychometric) OR MH psychometrics | 1,994,875 |
| <b>S12</b> | TI (SF-36 OR SF36 OR "Short Form 36" OR "36 SF")                                                                                             | 1,116     |
| <b>S13</b> | (S12 OR S4 OR S5) AND S11 AND LA english                                                                                                     | 511       |

### Appendix II: Search terms for Embase

| Embase Session Results (23 Jun 2017) |                                                                                                                |         |
|--------------------------------------|----------------------------------------------------------------------------------------------------------------|---------|
| No.                                  | Query                                                                                                          | Results |
| #1                                   | 'systemic lupus erythematosus'/exp/mj AND 'systemic lupus erythematosus':ab,ti                                 | 37436   |
| #2                                   | randomized controlled trial'/exp OR 'randomized controlled trial (topic)'/exp<br>OR rct:ab,ti OR random*:ab,ti | 1354497 |
| #3                                   | 'sf-36':ab,ti OR 'sf36':ab,ti OR 'short form 36':ab,ti OR '36 sf':ab,ti OR 'short form<br>36'/exp              | 40482   |
| #4                                   | 'lupus-qol':ab,ti OR 'lupus quality of life':ab,ti OR lupusqol:ab,ti                                           | 95      |
| #5                                   | 'facit-f':ab,ti OR ('functional assessment of chronic illness therapy':ab,ti<br>AND 'fatigue':ab,ti)           | 735     |
| #6                                   | #1 AND #2 AND (#3 OR #4 OR #5)                                                                                 | 65      |
| #7                                   | #6 AND ([article]/lim OR [article in press]/lim) AND [2015-2017]/py AND<br>[english]/lim                       | 9       |
| #8                                   | 'observational study'/exp OR observational:ab,ti                                                               | 206795  |
| #9                                   | #1 AND #8 AND (#3 OR #4 OR #5)                                                                                 | 18      |
| #10                                  | #9 AND ([article]/lim OR [article in press]/lim) AND [2015-2017]/py AND<br>[english]/lim                       | 2       |

|     |                                                                                                    |        |
|-----|----------------------------------------------------------------------------------------------------|--------|
| #11 | 'validity'/exp/mj OR validation:ab,ti OR validity:ab,ti OR development:ti<br>OR psychometric:ab,ti | 778101 |
| #12 | 'sf-36':ti OR 'sf36':ti OR 'short form 36':ti OR '36 sf':ti OR 'short form 36'/mj                  | 2066   |
| #13 | #12 OR #4 OR #5 AND #11 AND [english]/lim                                                          | 557    |

### Appendix III: Key articles used to validate the search and to supplement the library important literature

Key Articles used to initially validate key search terms at title, keyword and abstract levels. These articles should be captured in data-base search. See reference list for full citation.

- Strand V, Russell AS. Workshop report: WHO/ILAR Taskforce on Quality of Life. *J Rheumatol* 1997; 24:1630-3.
- Jolly M. How does quality of life of patients with systemic lupus erythematosus compare with that of other common chronic illnesses? *J Rheumatol* 2005; 32:1706-8.
- Gladman D, Urowitz MB, Ong A, Gough J, MacKinnon A. Lack of correlation among the 3 outcomes describing SLE: disease activity, damage and quality of life. *Clin Exp Rheumatol* 1996; 14:305-8.
- Strand V, Gladman D, Isenberg D, Petri M, Smolen J, Tugwell P. Outcome measures to be used in clinical trials in systemic lupus erythematosus. *J Rheumatol* 1999; 26:490-7.
- McElhone K, Abbott J, Teh L-S: A review of health related quality of life in systemic lupus erythematosus. *Lupus* 2006; 15:633-43.
- Dua AB, Touma Z, Toloza S, Jolly M: Top 10 recent developments in HRQOL in patients with systemic lupus erythematosus. *Curr Rheumatol Rep* 2013; 15:380
- Bruce IN, Mak VC, Hallett DC et al: Factors associated with fatigue in patients with systemic lupus erythematosus. *Ann Rheum Dis* 1999; 58:379-81.

- Petri M, Kawata AK, Fernandes AW, et al. Impaired health status and the effect of pain and fatigue on functioning in clinical trial patients with systemic lupus erythematosus. *J Rheumatol*. 2013; 40:1865-1874.
- Schmeding A, Schneider M. Fatigue, health-related quality of life and other patient-reported outcomes in systemic lupus erythematosus. *Best Pract Res Clin Rheumatol*. 2013; 27:363-375.
- Sterling K, Gallop K, Swinburn P, et al. Patient-reported fatigue and its impact on patients with systemic lupus erythematosus. *Lupus*. 2014; 23:124-132
- Ad Hoc Committee on Systemic Lupus Erythematosus Response Criteria for Fatigue. Measurement of fatigue in systemic lupus erythematosus: a systematic review. *Arthritis Rheum*. 2007; 57:1348-57.
- Strand V, Galateanu C, Phushparajah D, Nikai E, Sayers J, Wood R, van Vollenhoven RF: Limitations of current treatments for systemic lupus erythematosus: a patient and physician survey. *Lupus* 2013; 22: 819-26.
- Gordon C, Isenberg D, Lerstrøm K, et al. The substantial burden of systemic lupus erythematosus on the productivity and careers of patients: a European patient-driven online survey. *Rheumatology (Oxford)*. 2013; 52:2292-2301.
- Strand V, Gladman D, Isenberg D, Petri M, Smolen JS, Tugwell P. Endpoints: consensus recommendations from OMERACT IV. *Outcome Measures in Rheumatology*. *Lupus* 2000; 9:322-7.
- Stoll T, Gordon C, Seifert B, Richardson K, Malik J, Bacon PA, et al. Consistency and validity of patient administered assessment of quality of life by the MOS SF-36; its association with disease activity and damage in patients with systemic lupus erythematosus. *J Rheumatol* 1997; 24:1608-14.
- Mahieu M, Yount S, Ramsey-Goldman R: Patient reported outcomes in Systemic Lupus Erythematosus. *Rheum Dis N Am* 2016; 42:253-63.
- Castelino M, Abbott J, McElhone K, Teh L-S: Comparison of the psychometric properties of health related quality of life measures used in adults with systemic lupus erythematosus: a review of the literature. *Rheumatology* 2013; 52:684-696.
- McElhone K, Abbott J, Shelmerdine J, Bruce IN, Ahmad Y, Gordon C, et al. Development and validation of a disease-specific health-related quality of life

- measure, the LupusQoL, for adults with systemic lupus erythematosus. *Arthritis Rheum* 2007; 57:972-9.
- McElhone K, Abbott J, Gray J et al. Patient perspective of systemic lupus erythematosus in relation to health-related quality of life concepts: a qualitative study. *Lupus* 2010; 19:1640-7.( McElhone K, Abbot J, Williams A, et al. Patient perspective of systemic lupus erythematosus in relation to health-related quality of life concepts: a qualitative study. *Lupus*. 2010;19:1640-1647.)
  - Jolly M, Pickard SA, Mikolaitis RA et al. LupusQoL-US Benchmarks for US Patients with Systemic Lupus Erythematosus. *J Rheumatol* 2010; 37:1828–33
  - García-Carrasco M, Mendoza-Pinto C, Cardiel MH, et al. Health related quality of life in Mexican women with systemic lupus erythematosus: a descriptive study using SF-36 and LupusQoL. *Lupus*. 2012; 21:1219-1224.
  - Gonzalez-Rodriguez V, Peralta-Ramirez MI, Navarrete-Navarrete N, Callejas-Rubio JL, Santos Ruiz AM, Khamashta M. Adaptation and validation of the Spanish version of a disease specific quality of life measure in patients with systemic lupus erythematosus: the Lupus quality of life. *Med Clin (Barc)* 2010; 134:13-6.
  - Devilliers H, Amoura Z, Vesancenot J-F et al. LupusQoL-FR is valid to assess quality of life in patients with systemic lupus erythematosus. *Rheumatology* 2012; 51:1906-15.
  - Pamuk ON, Onat AM, Donmez S, et al. Validity and reliability of the Lupus QoL index in Turkish systemic lupus erythematosus patients. *Lupus* 2015; 24:816–21.
  - Hosseini N, Bonakdar ZS, Gholamrezaei A, et al. Linguistic validation of the LupusQoL for the assessment of quality of life in Iranian patients with systemic lupus erythematosus. *Int J Rheumatol* 2014:1515-30.
  - Conti F, Perricone C, Reboldi G, et al. Validation of a disease-specific health related quality of life measure in adult Italian patients with systemic lupus erythematosus: LupusQoL-IT. *Lupus* 2014; 23:743–51.

- Wang SL, Wu B, Leng L, et al. Validity of LupusQoL-China for the assessment of health related quality of life in Chinese patients with systemic lupus erythematosus. *PLoS One* 2013; 8:e63795.
- Touma Z, Gladman DD, Ibañez D, Urowitz MB. Is there an advantage over SF-36 with a quality of life measure that is specific to systemic lupus erythematosus? *J Rheumatol* 2011; 38:1898–905.
- McElhone K, Castelino M, Abbott J, Bruce IN, Ahmad Y, Shelmerdine J, et al. The LupusQoL and associations with demographics and clinical measurements in patients with systemic lupus erythematosus. *J Rheumatol* 2010; 37:2273-9.
- Jolly M, Pickard AS, Wilke C, Mikolaitis RA, Teh LS, McElhone K, et al. Lupus-specific health outcome measure for US patients: the LupusQoL-US version. *Ann Rheum Dis* 2010; 69:29-33.
- Strand V and Chu A: Editorial: Generic vs Disease Specific Measures of Health Related Quality of Life in Systemic Lupus Erythematosus. *J Rheumatol* 2011; 38:1821–3.
- Clowse MEB, Wallace DJ, Furie RA et al: Efficacy and Safety of Epratuzumab in Moderately to Severely Active Systemic Lupus Erythematosus Results From Two Phase III Randomized, Double-Blind, Placebo-Controlled Trials *Arth Rheum* 2017; 69:362-75.
- Devilliers H, Amoura Z, Vesancenot J-F et al. Responsiveness of the 36-item Short Form Health Survey and the Lupus Quality of Life questionnaire in SLE. *Rheumatology* 2015; 54:940-49 [repeat]
- McElhone K, Abbott J, Sutton C et al: Sensitivity to Change (Responsiveness) and Minimal Important Differences of the LupusQoL in patients with Systemic Lupus Erythematosus. *Arth Care Res* 2016; DOI 10.1002/acr.22850. [repeat]
- Nantes S, Strand V, Su J, Touma Z: Comparison of the sensitivity to change of the 36-item Short Form Health Survey and the LupusQoL using various definitions of minimal clinically important differences in patients with active systemic lupus erythematosus. *Arth Care Research* 2017; DOI 10.1002/acr.23240 [repeat]
- Strand V, Aranow C, Cardiel MH, Alarcon-Segovia D, Furie R, Sherrer Y, et al. Improvement in health-related quality of life in systemic lupus erythematosus



- patients enrolled in a randomized clinical trial comparing LJP 394 treatment with placebo. *Lupus* 2003; 12:677-86.
- Nordmark G, Bengtsson C, Larsson A, Karlsson FA, Sturfelt G, Ronnblom L. Effects of dehydroepiandrosterone supplement on health related quality of life in glucocorticoid treated female patients with systemic lupus erythematosus. *Autoimmunity* 2005; 38:531–540.
  - Thumboo J, Strand V. Health-related quality of life in patients with systemic lupus erythematosus: an update. *Ann Acad Med Singapore* 2007; 36:115-22.
  - Kiani AN, Petri M. Quality-of-life measurements versus disease activity in systemic lupus erythematosus. *Curr Rheumatol Rep* 2010; 12:250-8.
  - Strand V, Levy R, Cervera R, Petri MA, Birch H, Freimuth WW, Zhong J, Clarke AE for the BLISS-52 and -76 Study Groups: Improvements in health related quality of life with belimumab, a B-lymphocyte stimulator-specific inhibitor, in patients with autoantibody-positive systemic lupus erythematosus. *Annals Rheum Ds*: 2013; 10.1136/annrheumdis-2012-202865
  - Wallace DJ, Kalunian K, Petri M, Strand V, Houssiau F, Pike M, Kilgallen B, Bongardt S, Barry A, Kelley L, Gordon C: Efficacy and safety of epratuzumab in patients with moderate/severe active systemic lupus erythematosus: results from EMBLEM, a phase IIb randomized, double blind, placebo controlled multicenter study. *Ann Rheum Ds* 2013: 10.1136/annrheumdis-2012-202760
  - Wallace DJ, Strand V, Merrill JT, Popa S, Spindler AJ, Eimon A, Petri M, Smolen JS, Wajdula J, Christensen J, Li C, Diehl A, Vincent M, Beebe J, Healey P, Sridharan S: Efficacy and safety of an interleukin-6 monoclonal antibody for the treatment of systemic lupus erythematosus: a phase 2 dose-ranging randomised controlled trial. *Ann Rheum Ds* 2016; doi:10.1136/annrheumdis-2016-209668
  - Strand V, Diehl A, Christensen J et al: Improvements in Health-Related Quality of Life and Fatigue Following Administration of an IL-6 Monoclonal Antibody (PF-04236921) in an Enriched Population of Subjects with Active Systemic Lupus Erythematosus (SLE). *ACR* 2015; Abstract #1786.
  - Wolfe F, Michaud K, Li T, Katz RT. EQ-5D and SF-36 quality of life measures in systemic lupus erythematosus: comparisons with rheumatoid arthritis,

- noninflammatory rheumatic disorders, and fibromyalgia. *J Rheumatol* 2010; 37:296-304.
- Hanly JG, Urowitz MB, Jackson D, Bae SC, Gordon C, Wallace DJ, et al. SF-36 summary and subscale scores are reliable outcomes of neuropsychiatric events in SLE. *Ann Rheum Dis* 2011; 70:961-7.
  - Strand V, Crawford B, Singh J, Choy E, Smolen JS, Khanna D. Use of “spydergrams” to present and interpret SF-36 health-related quality of life data across rheumatic diseases. *Ann Rheum Dis* 2009; 68:1800-4.
  - Lai JS, Beaumont JL, Ogale S, Brunetta P, Cella D. Validation of the functional assessment of chronic illness therapy-fatigue scale in patients with moderately to severely active systemic lupus erythematosus, participating in a clinical trial. *J Rheumatol.* 2011; 38:672-679.
  - Kosinski M, Gajria K, Fernandes AW, Cella D. Qualitative validation of the FACIT-fatigue scale in systemic lupus erythematosus. *Lupus.* 2013; 22:422-430.
  - Merrill JT, Burgos-Vargas R, Westhovens R, et al. The efficacy and safety of abatacept in patients with non-life-threatening manifestations of systemic lupus erythematosus: results of a twelve-month, multicenter, exploratory, phase IIb, randomized, double-blind, placebo-controlled trial. *Arthritis Rheum.* 2010; 62:3077-3087.
  - Goligher EC, Pouchot J, Brant R, et al. Minimal clinically important difference for 7 measures of fatigue in patients with systemic lupus erythematosus. *J Rheumatol.* 2008; 35:635-642. (Goligher EC, Pouchot J, Brany R, et al. Minimal clinically important difference for 7 measures of fatigue in patients with systemic lupus erythematosus. *The Journal of Rheumatology.* 2008;35:635-642.
  - Doward LC, McKenna SP, Whalley D, Tennant A, Griffiths B, Emery P, et al. The development of the L-QoL: a quality-of-life instrument specific to systemic lupus erythematosus. *Ann Rheum Dis* 2009; 68:196-200.
  - Leong KP, Kong KO, Thong BY, Koh ET, Lian TY, Teh CL, et al. Development and preliminary validation of a systemic lupus erythematosus-specific quality-of-life instrument (SLEQOL). *Rheumatology* 2005; 44:1267-76.

- Ow YLM, Thumboo J, Cella D, Cheung YB, Fong KY, Wee HL. Domains of health related quality of life important and relevant to multiethnic English speaking Asian SLE patients: A focus group study. *Arthritis Care Res* 2011; 63:899-908.
- Jolly M, Pickard AS, Block JA, et al. Disease-specific patient reported outcome tools for systemic lupus erythematosus. *Semin Arthritis Rheum* 2012; 42:56–65.
- Jolly M, Peters KF, Mikolaitis R, et al. Body image intervention to improve health outcomes in lupus: a pilot study. *J Clin Rheumatol* 2014; 20:403–10.
- Jolly M, Garris CP, Mikolaitis RA, Jhingran PM, Dennis G, Wallace D, Clarke A, Dooley MA, Parke A, Strand V, Alarcon G, Kosinski M: Development and Validation of the Lupus Impact Tracker (LIT): a Tool for Clinical Practice to Facilitate Ongoing Dialog between Patients and Physicians about the Impact of Systemic Lupus Erythematosus (SLE). *Arth Care Res* 2014; 66:1542-50.

#### Appendix IV: Criteria for screening and selection process

|                                 | Include                                                                                                                                                                                                                                                           | Exclude                                                                                                                                                                                                                                                                                                                                                                                                                                                                                                                                                                                                                                                                                                                                                                                                                                                  |
|---------------------------------|-------------------------------------------------------------------------------------------------------------------------------------------------------------------------------------------------------------------------------------------------------------------|----------------------------------------------------------------------------------------------------------------------------------------------------------------------------------------------------------------------------------------------------------------------------------------------------------------------------------------------------------------------------------------------------------------------------------------------------------------------------------------------------------------------------------------------------------------------------------------------------------------------------------------------------------------------------------------------------------------------------------------------------------------------------------------------------------------------------------------------------------|
| <i>Title and abstract level</i> | <ul style="list-style-type: none"> <li>• <b>Population: Should</b> include Individuals experiencing SLE</li> <li>• <b>Outcome: Should</b> include description of concept related to health-related quality of life – SF-36, LupusQoL or FACIT-F</li> </ul>        | <ul style="list-style-type: none"> <li>• <b>Population:</b> Not SLE</li> <li>• <b>Outcome:</b> Not focused on health-related quality of life – SF-36, LupusQoL or FACIT-F</li> </ul>                                                                                                                                                                                                                                                                                                                                                                                                                                                                                                                                                                                                                                                                     |
| <i>Full Article Level</i>       | <ul style="list-style-type: none"> <li>• <b>Population:</b> Adult SLE diagnosis for the participants. If mixed diagnostic population, results will be excluded</li> <li>• <b>Outcome:</b> quality of life – particularly on SF-36, LupusQoL or FACIT-F</li> </ul> | <ul style="list-style-type: none"> <li>• <b>Any exclusion from title level</b></li> <li>• <b>Hierarchy of exclusion:</b> <ol style="list-style-type: none"> <li>1. Article not in English</li> <li>2. Full-text not available (i.e. abstract for conference) or not able to find full-text using multiple sources.</li> <li>3. Not peer-reviewed published evidence (e.g., grey literature, magazine article, thesis dissertation)</li> <li>4. Secondary report of the literature (review, book chapter, opinion report/editorial)</li> <li>5. Does not have quantitative data.</li> <li>6. <b>Population:</b> Does not include adult SLE diagnosis for participants.</li> <li>7. <b>Population:</b> If mixed population.</li> </ol> </li> <li>• <b>Outcome:</b> Does not report quality of life – particularly on SF-36, LupusQoL or FACIT-F</li> </ul> |

## References

1. Doria A, Rinaldi S, Ermani M, Salaffi F, Iaccarino L, Ghirardello A, et al. Health-related quality of life in Italian patients with systemic lupus erythematosus. II. Role of clinical, immunological and psychological determinants. *Rheumatology (Oxford)*. 2004 Dec;43(12):1580-6. PubMed PMID: 15367746.
2. Testa MA, Simonson DC. Assessment of quality-of-life outcomes. *N Engl J Med*. 1996 Mar 28;334(13):835-40. PubMed PMID: 8596551.
3. Strand CV, Russell AS. WHO/ILAR Taskforce on quality of life. *The Journal of rheumatology*. 1997 Aug;24(8):1630-3. PubMed PMID: 9263162.
4. Strand V, Gladman D, Isenberg D, Petri M, Smolen J, Tugwell P. Outcome measures to be used in clinical trials in systemic lupus erythematosus. *The Journal of rheumatology*. 1999 Feb;26(2):490-7. PubMed PMID: 9972993. Epub 1999/02/11. eng.
5. Norman GR, Sloan JA, Wywich KW. Interpretation of changes in health-related quality of life: the remarkable universality of half a standard deviation. *Medical care*. 2003 May;41(5):582-92. PubMed PMID: 12719681.
6. Ware JE, Jr., Sherbourne CD. The MOS 36-item short-form health survey (SF-36). I. Conceptual framework and item selection. *Medical care*. 1992 Jun;30(6):473-83. PubMed PMID: 1593914.
7. Ware JE, Kosinski M, Dewey JE. *How to Score Version 2 of the SF-36 Health Survey*. Lincoln, RI: QualityMetric Incorporated 20002000.
8. McElhone K, Abbott J, Shelmerdine J, Bruce IN, Ahmad Y, Gordon C, et al. Development and validation of a disease-specific health-related quality of life measure, the LupusQol, for adults with systemic lupus erythematosus. *Arthritis and rheumatism*. 2007 Aug 15;57(6):972-9. PubMed PMID: 17665467.
9. Mathias SD, Berry P, De Vries J, Pascoe K, Colwell HH, Chang DJ, et al. Patient experience in systemic lupus erythematosus: development of novel patient-reported symptom and patient-reported impact measures. *Journal of patient-reported outcomes*. 2017;2(1):11. PubMed PMID: 29757295. Pubmed Central PMCID: 5934913.
10. Yellen SB, Cella DF, Webster K, Blendowski C, Kaplan E. Measuring fatigue and other anemia-related symptoms with the Functional Assessment of Cancer Therapy

- (FACT) measurement system. *J Pain Symptom Manage*. 1997 Feb;13(2):63-74. PubMed PMID: 9095563.
11. Kwan A, strand V, Touma Z. The role of patient-reported outcomes in LSE. *Curr Treat Options in Rheum*. 2017;3:308-21.
  12. Barbacki A, Petri M, Avina-Zubieta A, Alarcon GS, Bernatsky S. Fatigue Measurements in Systemic Lupus Erythematosus. *The Journal of rheumatology*. 2019 Feb 1. PubMed PMID: 30709953.
  13. Lai JS, Beaumont JL, Ogale S, Brunetta P, Cella D. Validation of the functional assessment of chronic illness therapy-fatigue scale in patients with moderately to severely active systemic lupus erythematosus, participating in a clinical trial. *The Journal of rheumatology*. 2011 Apr;38(4):672-9. PubMed PMID: 21239746.
  14. Strand V, Aranow C, Cardiel MH, Alarcon-Segovia D, Furie R, Sherrer Y, et al. Improvement in health-related quality of life in systemic lupus erythematosus patients enrolled in a randomized clinical trial comparing LJP 394 treatment with placebo. *Lupus*. 2003;12(9):677-86. PubMed PMID: 14514130.
  15. Smolen JS, Strand V, Cardiel M, Edworthy S, Furst D, Gladman D, et al. Randomized clinical trials and longitudinal observational studies in systemic lupus erythematosus: consensus on a preliminary core set of outcome domains. *The Journal of rheumatology*. 1999 Feb;26(2):504-7. PubMed PMID: 9972996. Epub 1999/02/11. eng.
  16. Administration USFaD. Guidance for Industry: Systemic Lupus Erythematosus - Developing Medical Products for Treatment. 2010.
  17. Mokkink LB, Terwee CB, Stratford PW, Alonso J, Patrick DL, Riphagen I, et al. Evaluation of the methodological quality of systematic reviews of health status measurement instruments. *Quality of life research : an international journal of quality of life aspects of treatment, care and rehabilitation*. 2009 Apr;18(3):313-33. PubMed PMID: 19238586.
  18. Liberati A, Altman DG, Tetzlaff J, Mulrow C, Gotzsche PC, Ioannidis JP, et al. The PRISMA statement for reporting systematic reviews and meta-analyses of studies that evaluate health care interventions: explanation and elaboration. *PLoS medicine*.

2009 Jul 21;6(7):e1000100. PubMed PMID: 19621070. Pubmed Central PMCID: 2707010.

19. Shamseer L, Moher D, Clarke M, Gherzi D, Liberati A, Petticrew M, et al. Preferred reporting items for systematic review and meta-analysis protocols (PRISMA-P) 2015: elaboration and explanation. *Bmj*. 2015 Jan 2;350:g7647. PubMed PMID: 25555855.

20. Terwee CB, Bot SD, de Boer MR, van der Windt DA, Knol DL, Dekker J, et al. Quality criteria were proposed for measurement properties of health status questionnaires. *Journal of clinical epidemiology*. 2007 Jan;60(1):34-42. PubMed PMID: 17161752.

21. Aaronson N, Alonso J, Burnam A, Lohr KN, Patrick DL, Perrin E, et al. Assessing health status and quality-of-life instruments: attributes and review criteria. *Quality of life research : an international journal of quality of life aspects of treatment, care and rehabilitation*. 2002 May;11(3):193-205. PubMed PMID: 12074258.

22. Wells GA, Tugwell P, Kraag GR, Baker PR, Groh J, Redelmeier DA. Minimum important difference between patients with rheumatoid arthritis: the patient's perspective. *The Journal of rheumatology*. 1993 Mar;20(3):557-60. PubMed PMID: 8478873.

23. Strand V, Boers M, Idzerda L, Kirwan JR, Kvien TK, Tugwell PS, et al. It's good to feel better but it's better to feel good and even better to feel good as soon as possible for as long as possible. Response criteria and the importance of change at OMERACT 10. *The Journal of rheumatology*. 2011 Aug;38(8):1720-7. PubMed PMID: 21807792.

24. Engel L, Beaton DE, Touma Z. Minimal Clinically Important Difference: A Review of Outcome Measure Score Interpretation. *Rheumatic diseases clinics of North America*. 2018 May;44(2):177-88. PubMed PMID: 29622290.

25. Beaton DE, Maxwell LJ, Shea BJ, Wells GA, Boers M, Grosskleg S, et al. Instrument Selection Using the OMERACT Filter 2.1: The OMERACT Methodology. *The Journal of rheumatology*. 2019 Aug;46(8):1028-35. PubMed PMID: 30709952.
