# Supplementary material for: Measurement properties of selected patient-reported outcome measures for use in randomised controlled trials in patients with systemic lupus erythematosus: a systematic review
Source: PubMed Central journal article supplement — Lupus Sci Med. 2020 Jun 25;7(1):e000373. doi: 10.1136/lupus-2019-000373 (PMC7319706; doi:10.1136/lupus-2019-000373), 2020-06-25
Supplement: lupus-2019-000373supp002.pdf [file lupus-2019-000373supp002.pdf]

## SUPPLEMENTARY TABLES

Table S1. SF-36: Internal Consistency and Test–Retest Reliability in SLE

| Reference               | SF-36 Domain | Reliability                              |                          |
|-------------------------|--------------|------------------------------------------|--------------------------|
|                         |              | Internal Consistency<br>Cronbach's alpha | Test-retest Reliability* |
| Baba et al. 2018 (1)    | PF           | 0.87                                     | 0.79                     |
|                         | RP           | 0.85                                     | 0.76                     |
|                         | BP           | 0.86                                     | 0.78                     |
|                         | GH           | 0.87                                     | 0.84                     |
|                         | VT           | 0.86                                     | 0.75                     |
|                         | SF           | 0.85                                     | 0.73                     |
|                         | RE           | 0.86                                     | 0.54                     |
|                         | MH           | 0.89                                     | 0.77                     |
| Thumboo et al. 2000 (2) | PF           | 0.87                                     | 0.90                     |
|                         | RP           | 0.91                                     | 0.75                     |
|                         | BP           | 0.82                                     | 0.78                     |
|                         | GH           | 0.78                                     | 0.89                     |
|                         | VT           | 0.82                                     | 0.89                     |
|                         | SF           | 0.82                                     | 0.82                     |
|                         | RE           | 0.87                                     | 0.65                     |
|                         | MH           | 0.72                                     | 0.80                     |
| Thumboo et al. 1999 (3) | PF           | 0.92                                     | 0.78                     |
|                         | RP           | 0.94                                     | 0.67                     |
|                         | BP           | 0.96                                     | 0.79                     |
|                         | GH           | 0.84                                     | 0.88                     |
|                         | VT           | 0.87                                     | 0.72                     |
|                         | SF           | 0.90                                     | 0.70                     |
|                         | RE           | 0.91                                     | 0.71                     |
|                         | MH           | 0.84                                     | 0.83                     |

Abbreviations: BP=bodily pain; GH=general health; MH=mental health; PF=physical function; RE=role emotional; RP=role physical; SF=social functioning; SLE=systemic lupus erythematosus; VT=vitality.

\* Spearman's rank correlation

**Table S2. SF-36: Convergent Validity in SLE: HRQOL Measures**

| Reference                       | SF-36 Domain | Comparable Measure/Domain | Correlation <sup>a,b</sup> |
|---------------------------------|--------------|---------------------------|----------------------------|
| Nantes et al. 2018 (4)          | PF           | LupusQoL Physical health  | r=0.77                     |
|                                 | BP           | LupusQoL Pain             | r=0.75                     |
|                                 | VT           | LupusQoL Fatigue          | r=0.83                     |
|                                 | MH           | LupusQoL Emotional Health | r=0.77                     |
| McElhone et al. 2007 (5)        | PF           | LupusQoL Physical health  | r=0.82                     |
|                                 | BP           | LupusQoL Pain             | r=0.76                     |
|                                 | VT           | LupusQoL Fatigue          | r=0.66                     |
|                                 | MH           | LupusQoL Emotional Health | r=0.74                     |
| Yilmaz-Oner et al. 2016 (6)     | PF           | LupusQoL Physical health  | r=0.69                     |
|                                 | BP           | LupusQoL Pain             | r=0.62                     |
|                                 | VT           | LupusQoL Fatigue          | r=0.63                     |
|                                 | RE           | LupusQoL Emotional Health | r=0.69                     |
| Garcia-Carrasco et al. 2012 (7) | PF           | LupusQoL Physical Health  | Rho <sup>b</sup> =0.79     |
|                                 | RE           | LupusQoL Emotional Health | Rho <sup>b</sup> =0.61     |
|                                 | BP           | LupusQoL Pain             | Rho <sup>b</sup> =0.48     |
|                                 | VT           | Lupus QoL Fatigue         | Rho <sup>b</sup> =0.58     |
| Wolfe et al. 2010 (8)           | PCS          | EQ-5D                     | r=0.72                     |
|                                 | MCS          | EQ-5D                     | r=0.49                     |
|                                 | PCS          | EQ-5D VAS                 | r=0.61                     |
|                                 | MCS          | EQ-5D VAS                 | r=0.37                     |
| Touma et al. 2011 (9)           | PF           | LupusQoL Physical Health  | r=0.75                     |
|                                 | RE           | LupusQoL Emotional Health | r=0.62                     |
|                                 | BP           | LupusQoL Pain             | r=0.76                     |
|                                 | VT           | LupusQoL Fatigue          | r=0.75                     |

Abbreviations: BP=bodily pain; GH=general health; HRQOL=health-related quality of life; MCS=mental component subscale; MH=mental health; PCS=physical component subscale; PF=physical function; RE=role emotional; RP=role physical; SF=social functioning; SF-36=36-Item Health Survey – Short Form; VAS=visual analogue scale; VT=vitality.

<sup>a</sup> Spearman's correlations (r)

<sup>b</sup> Pearson's product moment correlation coefficient (rho)

**Table S3. SF-36: Divergent Validity in SLE: Disease Severity and Damage Measures**

| Reference                  | SF-36 Domain | Comparable Measure/Domain | Correlation <sup>a,b</sup>   |
|----------------------------|--------------|---------------------------|------------------------------|
| Baba et al. 2018 (1)       | All domains  | SLEDAI-2K                 | -0.06 to 0.08 <sup>b</sup>   |
|                            | All domains  | SDI                       | -0.47 to -0.08 <sup>b*</sup> |
| Touma et al. 2011 (9)      | PF           | SLEDAI-2K                 | r= 0.17 to -0.02             |
|                            | RP           |                           | r=-0.002 to -0.12            |
|                            | BP           |                           | r=-0.11 to -0.01             |
|                            | GH           |                           | r=0.14 to 0.20               |
|                            | VT           |                           | r=-0.10 to 0.06              |
|                            | SF           |                           | r=-0.16 to -0.13             |
|                            | RE           |                           | r=-0.16 to 0.02              |
|                            | MH           |                           | r=-0.16 to -0.05             |
| Wolfe et al. 2010 (8)      | PCS          | LDIQ                      | r=-0.434**                   |
|                            | MCS          | LDIQ                      | r=-0.141**                   |
|                            | PCS          | Comorbidity Index*        | r=-0.372**                   |
|                            | MCS          | Comorbidity Index*        | r=-0.272**                   |
| Thumboo et al. 2000<br>(2) | PF           | BILAG General             | r= -0.19 to 0.07             |
|                            | RP           |                           | r= -0.31 to 0.01             |
|                            | BP           |                           | r= -0.13 to 0.17             |
|                            | GH           |                           | r= -0.41 to 0.07             |
|                            | VT           |                           | r= -0.28 to 0.13             |
|                            | SF           |                           | r= -0.34 to 0.05             |
|                            | RE           |                           | r= -0.27 to 0.13             |
|                            | MH           |                           | r= -0.21 to 0.10             |
|                            | PF           | SDI                       | r= -0.35 to 0.03             |
|                            | RP           |                           | r= -0.31 to 0.11             |
|                            | BP           |                           | r= -0.33 to 0.17             |
|                            | GH           |                           | r= -0.29 to 0.14             |
|                            | VT           |                           | r= -0.17 to 0.16             |
|                            | SF           |                           | r= -0.24 to 0.19             |
|                            | RE           |                           | r= -0.14 to 0.16             |
|                            | MH           |                           | r= -0.21 to 0.14             |
| Thumboo et al. 1999<br>(3) | PF           | BILAG General             | r=-0.07                      |
|                            | RP           |                           | r=-0.36**                    |
|                            | BP           |                           | r=-0.35**                    |
|                            | GH           |                           | r=-0.16                      |
|                            | VT           |                           | r=-0.31**                    |
|                            | SF           |                           | r=-0.30**                    |
|                            | RE           |                           | r=-0.20**                    |
|                            | MH           |                           | r=-0.19**                    |
|                            | PF           | SDI                       | r=-0.20**                    |
|                            | RP           |                           | r=-0.17                      |
| BP                         | r=-0.02      |                           |                              |

| Reference | SF-36 Domain | Comparable Measure/Domain | Correlation <sup>a,b</sup> |
|-----------|--------------|---------------------------|----------------------------|
|           | GH           |                           | r= -0.10                   |
|           | VT           |                           | r= -0.04                   |
|           | SF           |                           | r= -0.08                   |
|           | RE           |                           | r= -0.06                   |
|           | MH           |                           | r= 0.04                    |

Abbreviations: BILAG=British Isles Lupus Assessment Group; BP=bodily pain; GH=general health; MCS=mental component subscale; MH=mental health; PCS=physical component subscale; PF=physical function; RE=role emotional; RP=role physical; SF=social functioning; SF-36=36-Item Health Survey – Short Form; SDI= SLICC/ACR damage index; SLEDAI-2K=Systemic Lupus Erythematosus Disease Activity Index 2000; SLE=systemic lupus erythematosus; SLICC=Systemic Lupus International Collaborating Clinics; SDI=SLICC/ACR damage index; VAS=visual analogue scale; VT=vitality.

\* Comorbidity was measured by a patient-reported composite comorbidity index (range 0–9) consisting of 11 present or past comorbid conditions including pulmonary disorders, myocardial infarction, other cardiovascular disorders, stroke, hypertension, diabetes, spine/hip/leg fracture, depression, gastrointestinal (GI) ulcer, other GI disorders, and cancer.

\*\* Significant p values <0.05

<sup>a</sup> Spearman's correlations (r)

<sup>b</sup> Pearson's product moment correlation coefficient (rho)

**Table S4. SF-36: Known-groups Validity in SLE**

| Reference                 | Anchor<br>(Clinical Severity Measure)                    | SF-36 Domain | Findings               |                             |         |
|---------------------------|----------------------------------------------------------|--------------|------------------------|-----------------------------|---------|
|                           |                                                          |              | Improved<br>(mean, CI) | Same/Worsened<br>(mean, CI) | p-value |
| Hanly et al. 2011<br>(10) | Physician<br>neuropsychiatric<br>event<br>questionnaire* | PF           | 5.34 ± 1.54            | -6.71 ± 3.46                | 0.0001  |
|                           |                                                          | RP           | 6.77 ± 3.28            | -3.69 ± 7.28                | 0.075   |
|                           |                                                          | BP           | 6.17 ± 1.75            | -3.10 ± 3.90                | 0.0006  |
|                           |                                                          | GH           | 4.88 ± 1.29            | -6.18 ± 2.90                | <0.0001 |
|                           |                                                          | VT           | 5.77 ± 1.56            | -4.53 ± 3.43                | 0.0001  |
|                           |                                                          | SF           | 7.50 ± 1.92            | -5.67 ± 4.24                | 0.0001  |
|                           |                                                          | RE           | 10.58 ± 3.46           | -11.06 ± 7.67               | 0.0010  |
|                           |                                                          | MH           | 6.52 ± 1.45            | -6.68 ± 3.19                | <0.0001 |

Abbreviations: BP=bodily pain; CI=confidence interval; GH=general health; MH=mental health; PF=physical function; SD=standard deviation; SF=social functioning; SF-36=36-Item Health Survey – Short Form; RE=role emotional; RP=role physical

\*A physician-generated 7-point Likert scale for NP events comparing the change in NP status between the onset of the event and time of study assessment was available for each NP event (1=patient demise, 2=much worse, 3=worse, 4=no change, 5=improved, 6=much improved, 7=resolved).

**Table S5. Minimum Clinically Important Differences for SF-36 in Patients with SLE**

| Reference                  | Criterion Measure                                                                                                                                                                                                                                                                         | Estimate                                                                                                                                                                                                                                                                                                                                                                  |
|----------------------------|-------------------------------------------------------------------------------------------------------------------------------------------------------------------------------------------------------------------------------------------------------------------------------------------|---------------------------------------------------------------------------------------------------------------------------------------------------------------------------------------------------------------------------------------------------------------------------------------------------------------------------------------------------------------------------|
| Colangelo et al. 2009 (11) | Patient-reported overall health status anchor: "How would you describe your overall status since your last visit?"—much better, somewhat better, about the same, somewhat worse, or much worse. Those who self-rated as better or worse were considered the "minimally changed" subgroups | <p><i>Mean (95% confidence interval)</i></p> <p>Much better: PCS=8.4(3.8,12.9)<br/> Much better: MCS=9.1 (4.0, 14.3)<br/> Somewhat Better: PCS=2.1 (0.4,3.8)<br/> Somewhat Better: MCS= 2.4 (-0.2, 5)<br/> Somewhat worse: PCS=-2.2 (-4.1, -0.3)<br/> Somewhat worse: MCS=-1.2 (-4.1,1.9)<br/> Much worse: PCS=-5.0 (-15.0,5.1)<br/> Much worse: MCS=0.7 (-12.1,13.5)</p> |
| Strand et al. 2005 (12)    | 15-point global rating of change scale improvement by a score of 6: "a little better" and worsening by a score of 10: "a little worse"                                                                                                                                                    | <p>For improvement: 6.7-11.4 points for domain scores and 3.4-4.9 for PCS</p> <p>For clinically important worsening: -14.7 to -1.7 points for domain scores and between -2.1 and -0.8 for MCS and PCS, respectively</p>                                                                                                                                                   |

Abbreviations: MCID=minimum clinically important difference; MCS=mental component subscale; PCS=physical component subscale; SF-36=36-Item Health Survey – Short Form.

**Table S6. Minimum Important Differences (MID) for SF-36 in Patients with SLE**

| Reference                         | Criterion Measure                                                                                                                      | Estimate                                                                  |                                                                               |
|-----------------------------------|----------------------------------------------------------------------------------------------------------------------------------------|---------------------------------------------------------------------------|-------------------------------------------------------------------------------|
|                                   |                                                                                                                                        | For clinical improvement<br>(2 or 3)<br>mean (95% confidence<br>interval) | For clinical deterioration<br>(-3 or -2)<br>mean (95% confidence<br>interval) |
|                                   |                                                                                                                                        | PF: 3.8 (1.8, 5.8)                                                        | PF: -2.4 (-4.3, -0.5)                                                         |
|                                   |                                                                                                                                        | RP: 10.8 (4.3, 17.4)                                                      | RP: -11.1 (-17.8, -4.5)                                                       |
|                                   |                                                                                                                                        | BP: 10.9 (8.0, 13.8)                                                      | BP: -6.7 (-9.4, -4.0)                                                         |
| McElhone et<br>al. 2016 (13)      | Anchor-based global rating of<br>change category                                                                                       | GH: 2.8 (1.2, 4.5)                                                        | GH: -2.0 (-3.4, -0.5)                                                         |
|                                   |                                                                                                                                        | VT: 10.9 (7.5, 14.3)                                                      | VT: -3.5 (-5.5, -1.4)                                                         |
|                                   |                                                                                                                                        | SF: 9.6 (5.4, 13.8)                                                       | SF: -4.2 (-8.8, 0.3)                                                          |
|                                   |                                                                                                                                        | RE: 10.2 (2.4, 18.0)                                                      | RE: -10.4 (-18.1, -2.7)                                                       |
|                                   |                                                                                                                                        | MH: 7.5 (5.3, 9.8)                                                        | MH: -5.1 (-7.1, -3.2)                                                         |
|                                   |                                                                                                                                        |                                                                           |                                                                               |
|                                   |                                                                                                                                        | PF: 1.9 (11.9)                                                            | PF: -4.9 (17)                                                                 |
|                                   |                                                                                                                                        | RP: 11.3 (34.2)                                                           | RP: -15.6 (37.1)                                                              |
| Devilliers et<br>al. 2015<br>(14) | MID was estimated as the<br>mean change in SF-36<br>observed in the minimally<br>improved and the minimally<br>worse Likert categories | BP: 10.8 (19.9)                                                           | BP: -12.8 (22.3)                                                              |
|                                   |                                                                                                                                        | GH: 3.3 (15.6)                                                            | GH: -7.8 (12.9)                                                               |
|                                   |                                                                                                                                        | VT: 2.0 (18.8)                                                            | VT: -4.4 (13.4)                                                               |
|                                   |                                                                                                                                        | SF: 8.5 (25.6)                                                            | SF: -7.7 (21.8)                                                               |
|                                   |                                                                                                                                        | RE: 7.8 (43.0)                                                            | RE: -11.8 (39.8)                                                              |
|                                   |                                                                                                                                        | MH: 3.7 (19.4)                                                            | MH: -7.1 (17.3)                                                               |

Abbreviations: MID=minimum important difference; MCS=mental component subscale; PCS=physical component subscale; SF-36=36-Item Health Survey – Short Form; SLE=systemic lupus erythematosus.

**Table S7. LupusQoL: Internal Consistency and Test-Retest Reliability in SLE**

| Reference                 | LupusQoL Domain | Reliability                              |                             |
|---------------------------|-----------------|------------------------------------------|-----------------------------|
|                           |                 | Internal Consistency<br>Cronbach's alpha | Test-retest<br>ICC (95% CI) |
| Meseguer et al. 2017 (15) | All             | Ranged from 0.88 to 0.95                 |                             |
| Anindito et al. 2016 (16) | PH              | 0.87                                     | 0.89                        |
|                           | PA              | 0.86                                     | 0.80                        |
|                           | PL              | 0.87                                     | 0.75                        |
|                           | IR              | 0.89                                     | 0.74                        |
|                           | BU              | 0.89                                     | 0.84                        |
|                           | EH              | 0.86                                     | 0.94                        |
|                           | BI              | 0.88                                     | 0.95                        |
|                           | FA              | 0.87                                     | 0.91                        |
| Jolly et al. 2010 (17)    | PH              | 0.93                                     | 0.92                        |
|                           | PA              | 0.93                                     | 0.88                        |
|                           | PL              | 0.93                                     | 0.92                        |
|                           | IR              | 0.91                                     | 0.88                        |
|                           | BU              | 0.92                                     | 0.83                        |
|                           | EH              | 0.94                                     | 0.84                        |
|                           | BI              | 0.89                                     | 0.81                        |
|                           | FA              | 0.85                                     | 0.68                        |
| McElhone et al. 2007 (5)  | PH              |                                          | 0.93 (0.87, 0.97)           |
|                           | PA              |                                          | 0.85 (0.77, 0.90)           |
|                           | PL              |                                          | 0.86 (0.77, 0.92)           |
|                           | IR              |                                          | 0.87 (0.73, 0.94)           |
|                           | BU              |                                          | 0.76 (0.64, 0.85)           |
|                           | EH              |                                          | 0.85 (0.74, 0.92)           |
|                           | BI              |                                          | 0.80 (0.65, 0.89)           |
|                           | FA              |                                          | 0.72 (0.50, 0.85)           |

Abbreviations: BI=body image; BU=burden; EH=emotional health; FA=fatigue; ICC=intraclass correlation coefficient; IR=Intimate relationships; LupusQoL=Lupus Quality of Life; PA=pain; PH=physical health; PL=planning; SLE=systemic lupus erythematosus; 95% CI=95% confidence interval.



**Table S8. LupusQoL: Construct Validity in SLE**

| Reference                 | LupusQoL Domain        | Comparable Domains         | Correlation |
|---------------------------|------------------------|----------------------------|-------------|
| Meseguer et al. 2017 (15) | PH                     | SLAQ symptom scale         | r= -0.72    |
|                           | PA                     | SLAQ symptom scale         | r= -0.76    |
|                           | FA                     | SLAQ symptom scale         | r= -0.70    |
|                           | PH                     | EQ-5D analogic scale       | r=0.76      |
|                           | PA                     | EQ-5D analogic scale       | r=0.80      |
|                           | PL                     | EQ-5D analogic scale       | r=0.76      |
| Nantes et al. 2018 (4)    | PH                     | SF-36 Physical Functioning | r=0.77      |
|                           | PA                     | SF-36 Bodily Pain          | r=0.75      |
|                           | EH                     | SF-36 Mental Health        | r=0.77      |
|                           | FA                     | SF-36 Vitality             | r=0.83      |
| Anindito et al. 2016 (16) | PH                     | SF-36 Physical Functioning | r=0.45      |
|                           | PA                     | SF-36 Bodily Pain          | r=0.38      |
|                           | EH                     | SF-36 Mental Health        | r=0.64      |
|                           | FA                     | SF-36 Vitality             | r=0.49      |
| Touma et al. 2011 (9)     | PH                     | SF-36 Physical Functioning | r=0.75      |
|                           | PA                     | SF-36 Bodily Pain          | r=0.76      |
|                           | EH                     | SF-36 Role Emotional       | r=0.62      |
|                           | FA                     | Sf-36 Vitality             | r=0.75      |
| Jolly et al. 2010 (17)    | PH                     | SF-36 Physical Functioning | r=0.73      |
|                           | PA                     | SF-36 Bodily Pain          | r=0.66      |
|                           | EH                     | SF-36 Mental Health        | r=0.72      |
|                           | FA                     | SF-36 Vitality             | r=0.70      |
|                           | PL                     | SF-36 Physical Functioning | r=0.63      |
|                           | BU                     | SF-36 Social Functioning   | r=0.54      |
|                           | PH                     | EQ-5D Usual Activities     | r= -0.64    |
|                           | PA                     | EQ-5D Pain                 | r= -0.50    |
|                           | EH                     | EQ-5D Anxiety/Depression   | r= -0.68    |
| PL                        | EQ-5D Usual Activities | r= -0.50                   |             |
| McElhone et al. 2007 (5)  | PH                     | SF-36 Physical Functioning | r=0.71      |
|                           | PA                     | SF-36 Bodily Pain          | r=0.76      |
|                           | MH                     | SF-36 Mental Health        | r=0.79      |
|                           | FA                     | SF-36 Vitality             | r=0.72      |

Abbreviations: BU=burden to others; EH=emotional health; FA=fatigue; LupusQoL=Lupus Quality of Life; MH=mental health; PA=pain; PH=physical health; PL=planning; SF-36=36-Item Health Survey – Short Form; SLAQ=Systemic Lupus Activity Questionnaire; SLE=systemic lupus erythematosus.

Table S9. LupusQoL: Known-groups Validity in SLE

| Reference                | LupusQoL Domain                | Anchor (Clinical Severity Measure) | Findings             |                          |                      |                 |  |
|--------------------------|--------------------------------|------------------------------------|----------------------|--------------------------|----------------------|-----------------|--|
|                          |                                |                                    | Improved (mean, SD)  | Same/Worsened (mean, SD) | p-value              |                 |  |
| Touma et al. 2011 (9)    | PH, PA, PL, IR, BU, EH, BI, FA | SLEDAI-2K                          | 71.9 ± 26.0          | 62.2 ± 24.3              | 0.17                 |                 |  |
|                          |                                |                                    | 76.2 ± 26.1          | 69.1 ± 29.2              | 0.36                 |                 |  |
|                          |                                |                                    | 78.6 ± 28.5          | 73.8 ± 29.2              | 0.52                 |                 |  |
|                          |                                |                                    | 81.3 ± 21.4          | 56.3 ± 37.7              | 0.01                 |                 |  |
|                          |                                |                                    | 64.5 ± 28.1          | 55.6 ± 26.6              | 0.25                 |                 |  |
|                          |                                |                                    | 77.8 ± 18.9          | 71.6 ± 25.0              | 0.34                 |                 |  |
|                          |                                |                                    | 72.2 ± 21.8          | 66.0 ± 29.5              | 0.41                 |                 |  |
|                          |                                |                                    | 64.7 ± 18.9          | 61.7 ± 26.8              | 0.67                 |                 |  |
| McElhone et al. 2007 (5) | PH, PA, PL, IR, BU, EH, BI, FA | BILAG Index                        | D/E/C in all systems | B in 1 system            | B in ≥ 2 systems     | A in any system |  |
|                          |                                |                                    | 65.89 ± 24.59        | 56.57 ± 25.40            | 55.00 ± 29.56        | 53.62 ± 29.76   |  |
|                          |                                |                                    | 68.43 ± 26.53        | 61.26 ± 25.13            | 59.33 ± 30.67        | 55.70 ± 30.81   |  |
|                          |                                |                                    | 71.68 ± 27.67        | 64.01 ± 28.56            | 58.16 ± 32.67        | 63.82 ± 28.47   |  |
|                          |                                |                                    | 67.06 ± 29.06        | 54.63 ± 36.27            | 60.80 ± 34.16        | 57.89 ± 32.33   |  |
|                          |                                |                                    | 64.72 ± 27.02        | 57.80 ± 28.35            | 52.48 ± 25.65        | 47.81 ± 32.26   |  |
|                          |                                |                                    | 76.96 ± 19.67        | 69.06 ± 21.73            | 72.25 ± 19.02        | 66.01 ± 22.10   |  |
|                          |                                |                                    | 77.57 ± 23.34        | 68.31 ± 27.70            | 65.97 ± 25.72        | 70.53 ± 25.22   |  |
|                          |                                |                                    | 55.64 ± 24.45        | 49.31 ± 24.48            | 47.30 ± 23.26        | 53.62 ± 26.46   |  |
|                          |                                |                                    |                      | SDI = 0                  | SDI ≥ 1              | P (95% CI)      |  |
|                          |                                |                                    | 64.41 ± 29.97        | 52.74 ± 26.36            | <0.002 (4.43, 20.48) |                 |  |
|                          |                                |                                    | 67.55 ± 26.18        | 56.83 ± 28.44            | <0.02 (1.34, 17.81)  |                 |  |
|                          |                                |                                    | 69.87 ± 28.41        | 60.51 ± 30.16            | <0.02 (1.64, 19.32)  |                 |  |
|                          |                                |                                    | 64.63 ± 32.36        | 54.65 ± 33.70            | <0.01 (2.96, 23.70)  |                 |  |
|                          |                                |                                    | 62.04 ± 27.65        | 55.78 ± 27.82            | <0.04 (0.61, 17.59)  |                 |  |
|                          |                                |                                    | 73.54 ± 20.93        | 72.35 ± 20.31            | NS (-3.70, 9.06)     |                 |  |
|                          |                                |                                    | 73.35 ± 25.19        | 70.31 ± 26.17            | NS (-5.69, 9.91)     |                 |  |
|                          |                                |                                    | 53.83 ± 23.85        | 49.09 ± 25.26            | NS (-2.51, 12.40)    |                 |  |

Abbreviations: BI=body image; BILAG=British Isles Lupus Assessment Group; BU=burden; EH=emotional health; FA=fatigue; IR=intimate relationships; LupusQoL=Lupus Quality of Life; NS=not significant; PA=pain; PL=planning; PH=physical health; SD=standard deviation; SDI= SLICC/ACR damage index; SF-36=36-Item Health Survey – Short Form; SLE=systemic lupus erythematosus; SLEDAI-2K=Systemic Lupus Erythematosus Disease Activity Index 2000; 95% CI=95% confidence interval.

**Table S10. LupusQoL: Minimum Clinically Important Difference in SLE**

| Reference                   | MCID Calculated in Relation to                                                                                               | Method                                                                                                                                                                                      | MCID Estimate             |                        |
|-----------------------------|------------------------------------------------------------------------------------------------------------------------------|---------------------------------------------------------------------------------------------------------------------------------------------------------------------------------------------|---------------------------|------------------------|
|                             |                                                                                                                              |                                                                                                                                                                                             | Improvement               | Deterioration          |
| McElhone et al. 2016 (13)   | Patient-completed GRC, ranging from 7 (a very great deal better) to -7 (a very great deal worse) with 0 indicating no change | MCIDs estimated using an anchor-based approach as mean changes in LupusQoL domains when minimal change (Deterioration= -3 or -2 points; Improvement =2 or 3 points) was reported on the GRC | PH=4.0                    | PH=-3.4                |
|                             |                                                                                                                              |                                                                                                                                                                                             | PA=6.8                    | PA=-4.7                |
|                             |                                                                                                                              |                                                                                                                                                                                             | PL=3.8                    | PL=-4.0                |
|                             |                                                                                                                              |                                                                                                                                                                                             | IR=7.1                    | IR=-8.7                |
|                             |                                                                                                                              |                                                                                                                                                                                             | BU=7.3                    | BU=-5.0                |
|                             |                                                                                                                              |                                                                                                                                                                                             | EH=4.7                    | EH=-3.7                |
|                             |                                                                                                                              |                                                                                                                                                                                             | BI=3.5                    | BI=-2.4                |
|                             |                                                                                                                              |                                                                                                                                                                                             | FA=6.6                    | FA=-3.2                |
| Devilliers et al. 2015 (14) | 7-point Likert scale describing change in lupus health status over 3 months                                                  | MCID determined as the mean change in LupusQoL domains observed in the minimally improved and the minimally worse Likert categories                                                         | <b>Minimally Improved</b> | <b>Minimally Worse</b> |
|                             |                                                                                                                              |                                                                                                                                                                                             | PH=3.4                    | PH=-3.6                |
|                             |                                                                                                                              |                                                                                                                                                                                             | PA=8.5                    | PA=-2.6                |
|                             |                                                                                                                              |                                                                                                                                                                                             | PL=6.5                    | PL=-5.0                |
|                             |                                                                                                                              |                                                                                                                                                                                             | IR=9.2                    | IR=-2.4                |
|                             |                                                                                                                              |                                                                                                                                                                                             | BU=5.3                    | BU=-2.2                |
|                             |                                                                                                                              |                                                                                                                                                                                             | EH=3.4                    | EH=-6.4                |
| BI=1.1                      | BI=-4.9                                                                                                                      |                                                                                                                                                                                             |                           |                        |
|                             |                                                                                                                              |                                                                                                                                                                                             | FA=3.9                    | FA=-0.5                |

Abbreviations: GRC=Global Rating of Change; LupusQoL=Lupus Quality of Life; MCID=minimum clinically important difference; SD=standard deviation; SEM=standard error of the mean; SLE=systemic lupus erythematosus.

**Table S11. FACIT-F: Construct Validity in SLE**

| Reference                 | Comparable Instrument       | Correlation           |                    |
|---------------------------|-----------------------------|-----------------------|--------------------|
|                           |                             | Baseline <sup>a</sup> | Week 52            |
| Strand et al. 2013 (48)   | SF-36 Vitality              |                       | 0.70 <sup>a</sup>  |
| Lai et al. 2011 (18)      | SF-36 PCS                   | 0.59                  | 0.84 <sup>b</sup>  |
|                           | SF-36 MCS                   | 0.52 <sup>b</sup>     | 0.69 <sup>b</sup>  |
|                           | SF-36 VT                    | 0.68 <sup>b</sup>     | 0.87 <sup>b</sup>  |
|                           | BILAG Total                 | -0.26 <sup>b</sup>    | -0.25 <sup>b</sup> |
|                           | Pain intensity              | -0.60 <sup>b</sup>    | -0.72 <sup>b</sup> |
|                           | Pain interference           | -0.72 <sup>b</sup>    | -0.82 <sup>b</sup> |
|                           | Patient Global Assessment   | -0.58 <sup>b</sup>    | -0.76 <sup>b</sup> |
|                           | Physician Global Assessment | -0.09 <sup>b</sup>    | -0.25 <sup>b</sup> |
| Goligher et al. 2008 (19) | SLAQ                        | 0.59 <sup>a</sup>     |                    |
|                           | Patient Global Assessment   | 0.49 <sup>a</sup>     |                    |

Abbreviations: BILAG=British Isles Lupus Assessment Group; FACIT-F=Functional Assessment of Chronic Illness Therapy-Fatigue; MCS=mental component subscale; PCS=physical component subscale; SF-36=36-Item Health Survey – Short Form; SLAQ=Systemic Lupus Activity Questionnaire; SLE=systemic lupus erythematosus; VT=vitality.

<sup>a</sup> Pearson correlations

<sup>b</sup> Spearman correlations

**Table S12. FACIT-F: Known-Groups Validity in SLE**

| Reference                  | Anchor<br>(Clinical Severity Measure) | Findings                |                       |                 |                |                                             |
|----------------------------|---------------------------------------|-------------------------|-----------------------|-----------------|----------------|---------------------------------------------|
|                            |                                       | C/D/E<br>(mean, SD)     | B<br>(mean, SD)       | A<br>(mean, SD) | p-value        | Effect Size                                 |
| Lai et al.<br>2011<br>(18) | BILAG Musculoskeletal, Baseline       | 25.1 (13.4)             | 18.9 (11.1)           | 15.7 (9.7)      | <0.001         | <b>C/D/E vs B:</b><br>0.53;<br>B vs A: 0.30 |
|                            | BILAG General, Baseline               | 21.9 (12.0)             | 15.8 (9.7)            | 13.1 (9.0)      | 0.001          | C/D/E vs B:<br>0.52<br>B vs A: 0.24         |
|                            | BILAG Musculoskeletal, Week 12        | 26.8 (13.2)             | 21.4 (11.5)           | 18.8 (12.5)     | 0.003          | C/D/E vs B:<br>0.42;<br>B vs A: 0.22        |
|                            |                                       | <b>C/D/E (mean, SD)</b> | <b>A/B (mean, SD)</b> |                 | <b>p-value</b> | <b>Effect Size</b>                          |
|                            | BILAG General, Week 12                | 25.9 (13.0)             | 17.5 (10.3)           |                 | 0.001          | 0.65                                        |

Abbreviations: BILAG=British Isles Lupus Assessment Group; FACIT-F=Functional Assessment of Chronic Illness Therapy-Fatigue; SD=standard deviation SLE=systemic lupus erythematosus.

**Table S13. FACIT-F: Minimum Clinically Important Difference in SLE**

| Reference                 | MCID Calculated in Relation to                                                                                                                                                                                                                                                                | Method                                                                                                                            | MCID Estimate                                                                               |
|---------------------------|-----------------------------------------------------------------------------------------------------------------------------------------------------------------------------------------------------------------------------------------------------------------------------------------------|-----------------------------------------------------------------------------------------------------------------------------------|---------------------------------------------------------------------------------------------|
| Lai et al. 2011 (18)      | Patient Global Assessment of Change, BILAG Musculoskeletal change, and BILAG General change                                                                                                                                                                                                   | Combination of scores derived from responsiveness analyses, as well as distribution-based estimates using 1/3 SD, 1/2 SD, and SEM | 3-7 points                                                                                  |
| Goligher et al. 2008 (19) | Six fatigue scales were used in addition to the FACIT-F, including the FSS, SF-36 VT, MAF, CFS, MFI, and an 11-point fatigues NRS. Conversations between pairs of participants followed, and then each participant rated their fatigue in relation to another participant on a 7- point scale | Estimated using a paired approach                                                                                                 | Greater fatigue using normalized score =17.5;<br>Less fatigue using normalized score = -5.3 |
|                           |                                                                                                                                                                                                                                                                                               | Estimated using an unpaired, linear regression approach                                                                           | Original Scaling = -5.9 points                                                              |

Abbreviations: BILAG=British Isles Lupus Assessment Group; CFS=Chalder Fatigue Scale; FACIT-F=Functional Assessment of Chronic Illness Therapy-Fatigue; FSS=Fatigue Severity Scale; MAF=Multidimensional Assessment of Fatigue; MCID=minimal clinically important different; MFI=Multidimensional Fatigue Inventory; NRS=numeric rating scale; SEM=standard error of the mean; SF-36 VT=SF-36 vitality; SLE=systemic lupus erythematosus.

## Appendix Tables

**Table A1. Basic Instrument Properties: SF-36, LupusQoL, and FACIT-F**

| Instrument Properties                          | SF-36                                                                                                                                                                                                                                                                                                                                                                                                                                                                                                                                                                                                                                                                                                                                                                                                 | LupusQoL                                                                                                                                                                                                                                                                                                    | FACIT-F                                                                                                 |
|------------------------------------------------|-------------------------------------------------------------------------------------------------------------------------------------------------------------------------------------------------------------------------------------------------------------------------------------------------------------------------------------------------------------------------------------------------------------------------------------------------------------------------------------------------------------------------------------------------------------------------------------------------------------------------------------------------------------------------------------------------------------------------------------------------------------------------------------------------------|-------------------------------------------------------------------------------------------------------------------------------------------------------------------------------------------------------------------------------------------------------------------------------------------------------------|---------------------------------------------------------------------------------------------------------|
| Initial language/<br>Country of<br>development | English, UK                                                                                                                                                                                                                                                                                                                                                                                                                                                                                                                                                                                                                                                                                                                                                                                           | English, UK                                                                                                                                                                                                                                                                                                 | English, US                                                                                             |
| Pathology/Disease                              | Generic instrument for all populations                                                                                                                                                                                                                                                                                                                                                                                                                                                                                                                                                                                                                                                                                                                                                                | SLE                                                                                                                                                                                                                                                                                                         | Chronic Illness                                                                                         |
| Objective/General<br>Concept                   | To measure HRQoL in adults                                                                                                                                                                                                                                                                                                                                                                                                                                                                                                                                                                                                                                                                                                                                                                            | To measure disease-specific HRQoL in<br>adult patients with SLE                                                                                                                                                                                                                                             | To measure fatigue in people with<br>chronic illnesses                                                  |
| Recall Period                                  | Acute version = last week<br>Chronic version = within the last 4 weeks                                                                                                                                                                                                                                                                                                                                                                                                                                                                                                                                                                                                                                                                                                                                | Past 4 weeks                                                                                                                                                                                                                                                                                                | Past 7 days                                                                                             |
| Domains (# of<br>items)                        | 36 items in 8 domains summarized into physical and mental<br>component summary scores; domains = physical functioning,<br>role limitations due to physical problems, bodily pain, general<br>health perception, energy/vitality, social functioning, role<br>limitations due to emotional problems, mental health                                                                                                                                                                                                                                                                                                                                                                                                                                                                                     | 34 items in 8 domains (physical health,<br>pain, planning, intimate relationship, burden<br>to others, emotional health, body image,<br>fatigue)                                                                                                                                                            | 13 items related to fatigue                                                                             |
| Response Options                               | Various response scales (1-5: excellent, very good, good, fair,<br>poor; 1-5: much better now than one year ago, somewhat better<br>now than one year ago, about the same, somewhat worse now<br>than one year ago, much worse now than one year ago; 1-3: yes,<br>limited a lot, yes, limited a little, no, not limited at all; Yes/No; 1-5:<br>not at all, slightly, moderately, quite a bit, extremely; 1-6: none,<br>very mild, mild, moderate, severe, very severe; 1-6: all of the<br>time, most of the time, all good bit of the time, some of the time,<br>a little of the time, none of the time; 1-5: all of the time, most of<br>the time, some of the time, a little of the time, none of the time; 1-<br>5: definitely true, mostly true, don't know, mostly false, definitely<br>false) | 5-point Likert response scale (0-4: all the<br>time, most of the time, a good bit of the<br>time, occasionally, never; also "not<br>applicable" which does not receive a score)                                                                                                                             | 4-point Likert response scale (very<br>much, quite a bit, somewhat, a little bit<br>and not at all) 0-4 |
| Administration<br>Mode                         | Paper and electronic versions available (suitable for self-<br>administration or administration by a trained interviewer in person<br>or by telephone)                                                                                                                                                                                                                                                                                                                                                                                                                                                                                                                                                                                                                                                | Paper and electronic versions available via<br>self-administration                                                                                                                                                                                                                                          | Paper and electronic versions available<br>via self-administration                                      |
| Length of<br>Administration                    | 5-10 minutes                                                                                                                                                                                                                                                                                                                                                                                                                                                                                                                                                                                                                                                                                                                                                                                          | 10 minutes or less                                                                                                                                                                                                                                                                                          | 5-10 minutes                                                                                            |
| Scoring                                        | PCS and MCS have always used z transformation and normative<br>scoring of all 8 domains. Normative values = 50; SD=10<br>Version 2.0 scoring uses norm-based scoring algorithms for all 8<br>domains, with 50 defined as "normative". Domain scores without<br>z transformation and normative scores range from 0 to 100<br>(higher scores indicate a better HRQoL) and are preferable when<br>comparing across treatments or vs age and gender-matched<br>norms                                                                                                                                                                                                                                                                                                                                      | Mean raw domain is calculated by adding<br>the response scores for each domain and<br>then dividing the total by the number of<br>items in the domain. The mean raw domain<br>is then divided by 4 and multiplied by 100<br>for a transformed score. Scores range from<br>0-100 (worst HRQoL to best HRQoL) | Total score ranges from 0-52; high score<br>represents less fatigue                                     |

| Instrument Properties            | SF-36                                               | LupusQoL                                             | FACIT-F                                                 |
|----------------------------------|-----------------------------------------------------|------------------------------------------------------|---------------------------------------------------------|
| Version Assessed                 | US Version 2                                        | Version 1                                            | FACIT-F (Version 4)                                     |
| Translations Available           | Translated in more than 40 countries                | Translated into 77 languages for use in 51 countries | Translated into over 45 languages                       |
| Reading and Comprehension Levels | 6 <sup>th</sup> -grade reading level                | Not provided                                         | 4 <sup>th</sup> grade reading level (9 or 10 years old) |
| Year Developed                   | Original development in 1988; standard form in 1990 | Original development and validation study in 2007    | Original development of questionnaires was in 1993      |
| Previous Version History         | Version 1.0                                         | No previous versions                                 | Versions 1, 2, and 3                                    |

Abbreviations: FACT=Functional Assessment of Cancer Therapy; FACIT-F=Functional Assessment of Chronic Illness Therapy-Fatigue; HRQoL=health-related quality of life; IQOLA=International Quality of life Assessment; LupusQoL=Lupus Quality of Life; MCS=mental component summary; PCS=physical component summary; PRO=patient-reported outcome; SD=standard deviation; SF-36=36-Item Health Survey – Short Form; SLE=systemic lupus erythematosus; UK=United Kingdom; US=United States.



**Table A2. RCT Studies in SLE Including SF-36, LupusQoL, and FACIT-F**

| Citation and Study Location                          | Study Design, Population and Intervention Description                                                                                                                                 | Study Objectives                                                                                                                            | Outcome Assessments                                              | Key Clinical Findings                                                                                                                       | PRO Findings                                                                                                                                                                                                                                               |
|------------------------------------------------------|---------------------------------------------------------------------------------------------------------------------------------------------------------------------------------------|---------------------------------------------------------------------------------------------------------------------------------------------|------------------------------------------------------------------|---------------------------------------------------------------------------------------------------------------------------------------------|------------------------------------------------------------------------------------------------------------------------------------------------------------------------------------------------------------------------------------------------------------|
| Abrahão et al. 2016 (20)<br>Brazil                   | Single-center parallel, blind RCT (n=63). Patients randomized to 3 groups: cardiovascular training (CT), resistance training (RT), and control. Study duration 12 weeks               | To compare the efficacy of CT with RT in improving the HRQoL and physical function of patients with SLE                                     | SF-36<br>BDI<br>SLEDAI                                           | No statistically significant difference in disease activity (SLEDAI) for patients in the intervention groups                                | Significant improvement in SF-36 scores for CT and RT groups (except VT in the RT group). CT patients reported higher SF-36 scores on RP and VT compared to RT and control groups. No statistically significant difference across the groups in depression |
| Arriens et al. 2015 (21)<br>United States            | Single-center, placebo-controlled trial (n=32). Patients randomized to fish oil supplementation or placebo. Study duration 6 months                                                   | To evaluate the effect of fish oil on clinical measures of fatigue, HRQoL, and disease activity.                                            | RAND SF-36<br>FSS<br>SLEDAI<br>PGA                               | Change in SLEDAI scores were not statistically significant between groups                                                                   | Significant improvement in PGA for treated patients vs placebo (p=0.015). Trend in improvement for the fish oil group for SF-36 VT and EF compared to the placebo group (p≤0.092)                                                                          |
| Bostrom et al. 2016 (22)<br>Sweden                   | Single-center, blind RCT (n=35). Patients randomized to intervention (physical activity program) or control. Study duration 1 year                                                    | To study the effects of physical activity program on aerobic capacity (primary outcome), physical activity, and HRQoL, (secondary outcomes) | Maximal oxygen uptake from bicycle ergometer test<br>SF-36       | V02 max increased independent of treatment group; no significant differences between the groups during the study period                     | Significant increase in SF-36 MF at 6 months in the I-group; difference was significantly different from that of the control group (p=0.03). No significant changes over time for other subscales                                                          |
| Cardiel et al. 2008 (23)<br>North America and Europe | Multi-center, double-blind placebo-controlled RCT (n=317). Patients randomized to abetimus at 100 mg/ week or placebo. Study duration 22 months                                       | To investigate whether treatment with abetimus delays renal flare in patients with lupus nephritis                                          | SLEDAI<br>SF-36                                                  | Abetimus did not significantly prolong time to renal flare or time to SLE flare                                                             | No significant improvements demonstrated within abetimus group or between the abetimus and placebo groups                                                                                                                                                  |
| Clowse et al. 2017 (24)<br>Multiple countries        | Two double-blind, placebo-controlled trials: EMBODY 1 (n=793) and EMBODY 2 (n=791). Patients randomized to receive placebo, epratuzumab 600 mg, or 1,200 mg. Study duration 48 weeks. | EMBODY 1 and EMBODY 2 trials, assessing the efficacy and safety of epratuzumab                                                              | BILAG-2004<br>SLEDAI-2K<br>BICLA<br>SF-36<br>LupusQoL<br>FACIT-F | The primary endpoint was not met in EMBODY 1 or 2. No significant differences seen in the proportion of responders between treatment groups | Improvements were seen in all PROs, but no significant differences between groups                                                                                                                                                                          |

| Citation and Study Location                  | Study Design, Population and Intervention Description                                                                                                 | Study Objectives                                                                                                                              | Outcome Assessments                                                            | Key Clinical Findings                                                                                                                                                     | PRO Findings                                                                                                                                                                                                                             |
|----------------------------------------------|-------------------------------------------------------------------------------------------------------------------------------------------------------|-----------------------------------------------------------------------------------------------------------------------------------------------|--------------------------------------------------------------------------------|---------------------------------------------------------------------------------------------------------------------------------------------------------------------------|------------------------------------------------------------------------------------------------------------------------------------------------------------------------------------------------------------------------------------------|
| Danowski et al. 2006 (25)<br>United States   | Single-center RCT (n=50). Subjects randomized to receive oral methylprednisolone with rapid tapering or triamcinolone 100 mg. Study duration 3 months | To investigate whether triamcinolone is superior to oral corticosteroids for mild/moderate flare in patients with lupus                       | SF-36<br>SELENA-SLEDAI                                                         | Both treatment groups did equally well. Triamcinolone may lead to a more rapid response in improvement of mild to moderate flare than methylprednisolone (69.5% vs 41.6%) | 66.6% of patients in the oral methylprednisolone group and 73.9% in the triamcinolone group had some improvement in SF-36 at week 4                                                                                                      |
| Dobkin et al. 2002 (26)<br>Canada            | Multi-center RCT (n=133). Patients randomized to brief supportive expressive group psychotherapy or a control group. Study duration 12 months         | To evaluate the effect of group psychotherapy in reducing psychological distress, clinical outcomes, and healthcare costs, and improving HRQL | Symptom Checklist 90-revised<br>SF-36<br>SLAM<br>SLICC/ACR damage index<br>HAQ | No clinically important differences between the groups on any outcome measures                                                                                            | No difference in SF-36 domains between the treatment and control group                                                                                                                                                                   |
| Dussan et al. 2008 (27)<br>United States     | Parallel group RCT (n=47) comparing high-dose CYC (HD-CYC) and monthly CYC (M-CYC). Study duration 2.5 years.                                         | To compare HRQoL between HD-CYC and M-CYC                                                                                                     | SF-36                                                                          | Not applicable                                                                                                                                                            | At 6 months, HD-CYC group showed more improvement in SF-36 GH (p=0.026) and SF (p=0.0082) compared to M-CYC. At 18 months, HD-CYC showed more improvement in SF-36 RP (p=0.025). At 2.5 years, no significant differences between groups |
| Fiechtner & Montroy 2014 (28)<br>Lansing, MI | Single-center, open-label RCT (n=10) evaluating Acthar Gel by subcutaneous injection. Study duration 28 days                                          | To evaluate the efficacy of Acthar Gel for reducing active SLE                                                                                | SELENA-SLEDAI<br>PGA<br>LupusQoL<br>FACIT-F                                    | The primary endpoint of SLEDAI-2K improvement was reached at all observation times (p<0.05)                                                                               | All PROs significantly improved from baseline to 28 days: LupusQoL (p<0.03), FACIT-F (p<0.01), and Physician/Patient PGA (both p<0.01)                                                                                                   |
| Fortin et al. 2008 (29)<br>Canada            | Multi-center, double-blind, placebo-controlled RCT (n=86). Patients randomized to methotrexate and placebo. Study duration 12 months                  | To assess the potential benefits of methotrexate SLE                                                                                          | SLAM-R<br>SLEDAI<br>SF-36                                                      | SLAM-R scores showed significant improvement in the mean scores (p=0.039). No significant differences with SLEDAI                                                         | No significant differences in SF-36 PCS and MCS scores between treatment groups                                                                                                                                                          |
| Furie et al. 2017 (30)<br>Multiple countries | Phase 2b RCT (n=305). Patients randomized to IV placebo, anifrolumab 300 mg, or anifrolumab 1,000 mg. Study duration 48 weeks                         | To assess efficacy and safety of type I interferon (IFN) in moderate-to-severe SLE                                                            | SRI<br>SF-36<br>FACIT-F                                                        | Primary endpoint met. INF patients achieved significantly greater responses in SRI compared to placebo (p<0.05)                                                           | Compared to placebo, greater proportions in 300 mg INF achieved >3-point FACIT score, and ≥ 3 SF-36 PCS and MCS scores. None of the comparisons were statistically significant                                                           |

| Citation and Study Location                  | Study Design, Population and Intervention Description                                                                                                      | Study Objectives                                                                                         | Outcome Assessments                                                                        | Key Clinical Findings                                                                                                                                                            | PRO Findings                                                                                                                                                                                                                                          |
|----------------------------------------------|------------------------------------------------------------------------------------------------------------------------------------------------------------|----------------------------------------------------------------------------------------------------------|--------------------------------------------------------------------------------------------|----------------------------------------------------------------------------------------------------------------------------------------------------------------------------------|-------------------------------------------------------------------------------------------------------------------------------------------------------------------------------------------------------------------------------------------------------|
| Furie et al. 2011 (31)<br>United States      | Randomized, placebo-controlled Ph 3 trial (n=819). Patients randomized to 1 mg/kg belimumab, 10 mg/kg belimumab, or placebo. Study duration: 76 weeks.     | To assess the efficacy/safety of the B lymphocyte stimulator inhibitor belimumab                         | SRI<br>SELENA-SLEDAI<br>SF-36                                                              | Significantly more SRI responders in 10-belimumab group than in placebo (p=0.017). No significant difference in 1-belimumab vs placebo. At 76 weeks no difference between groups | At week 24, no significant differences between groups in mean change in SF-36 PCS scores. At week 52, PCS score improvements were significant for belimumab groups compared placebo (p=0.012). At week 76, no significant group differences           |
| Furie et al. 2008 (32)<br>United States      | Ph I, double-blind, randomized, dose-escalation study. Patients randomized to placebo or 1.0, 4.0, 10, or 20 mg/kg of belimumab. Study duration: 52 weeks. | To evaluate the safety, biologic activity, and pharmacokinetics of belimumab                             | SELENA-SLEDA<br>Flare Index<br>PGA<br>SF-36                                                | No significant differences between treatment groups in SELENA-SLEDAI, PGA, or flare rates                                                                                        | No significant differences in any SF-36 summary or domain scores                                                                                                                                                                                      |
| Gordon et al. 2008 (33)<br>United States     | Double-blind, placebo-controlled RTC (n=68). Patients randomized to testosterone and placebo. Study duration: 12 weeks.                                    | To compare the efficacy and safety of testosterone and placebo patches in mild/moderate disease activity | SF-36<br>DSFI<br>PGA<br>SLAM-R<br>SELENA-SLEDAI<br>BILAG                                   | T-group showed significant improvement in SLAM-R scores from baseline (change of 2.06±3.3, p=0.01)                                                                               | Significant difference between treatment groups in mean change of score in "health transition" question of SF-36 (p=0.03). No other significant differences in SF-36. No significant differences in DSFI scores                                       |
| Greco et al. 2008 (34)<br>United States      | Single-center, double-blind pilot RCT (n=24). Patients randomized to acupuncture, minimal needling, or usual care. Study duration: 5 weeks                 | To pilot test the safety and benefits of acupuncture to reduce pain and fatigue in patients with SLE     | AIMS2-Pain<br>MPI<br>SF-36<br>FSS<br>SLEDAI                                                | 40% of patients who received acupuncture reported ≥30% improvement in pain; no improvement in pain reported for usual care                                                       | SF-36 BP improved for acupuncture (mean change 3.0 (±9.5)), minimal needling (mean change 2.7 (±6.4)) and usual care (mean change 0.58 (±5.0)). SF-36 VT improved for acupuncture (mean change 1.6 (±8.0)), minimal needling (mean change 4.0 (±9.1)) |
| Hartkamp et al. 2010 (35)<br>The Netherlands | Single-center, double-blind placebo-controlled RCT (n=30). Participants with inactive SLE received DHEA or placebo. Study duration: 12 months.             | To investigate the effects of DHEA on fatigue, mental well-being, and function in inactive SLE           | Multidimensional fatigue inventory<br>Zung self-rating depressive scale<br>SF-36 MCS & PCS | Not reported                                                                                                                                                                     | In both groups, general fatigue (p<0.001) and SF-36 MCS (p=0.04) significantly improved. No difference between DHEA and placebo groups for general fatigue and well-being and SF-36 PCS                                                               |
| Jolly et al. 2016 (36)<br>France             | Post hoc analysis from the PLUS study (7-month RCT) (n=166). Patients with SLE hydroxychloroquine (HCQ) levels 100 to 750 ng/mL randomized to no           | To assess the association and predictive value of blood HCQ levels toward HRQoL in SLE                   | SF-36                                                                                      | Not reported                                                                                                                                                                     | No significant correlations between HRQoL and HCQ; no differences when stratified by dose                                                                                                                                                             |

| Citation and Study Location                | Study Design, Population and Intervention Description                                                                                                                                                                                                      | Study Objectives                                                                                         | Outcome Assessments                                                                 | Key Clinical Findings                                                                                                                                                             | PRO Findings                                                                                                                                                                                                                                            |
|--------------------------------------------|------------------------------------------------------------------------------------------------------------------------------------------------------------------------------------------------------------------------------------------------------------|----------------------------------------------------------------------------------------------------------|-------------------------------------------------------------------------------------|-----------------------------------------------------------------------------------------------------------------------------------------------------------------------------------|---------------------------------------------------------------------------------------------------------------------------------------------------------------------------------------------------------------------------------------------------------|
|                                            | daily dose change or increase in HCQ dose to meet target level                                                                                                                                                                                             |                                                                                                          |                                                                                     |                                                                                                                                                                                   |                                                                                                                                                                                                                                                         |
| Karlson et al. 2004 (37)<br>United States  | RTC (n=64). Patients and their partners randomized to a nurse-led patient/partner psychoeducation followed with monthly telephone calls or control group with a 45-min video presentation followed with monthly telephone calls. Study duration: 12 months | To evaluate psychoeducational program to improve patient self-efficacy and partner support to manage SLE | SF-36 MCS & PCS<br>SLAQ & SLAM<br>Fatigue<br>Couples communication<br>Self-efficacy | At 12 months, experimental group significantly improved in social support, self-efficacy, couple's communication, and fatigue compared to the controls (p<0.05)                   | SF-36 – MCS was higher in the experimental group compared to the control group (p=0.04). SF-36 PCS was higher in the experimental group compared to control, but not significantly different                                                            |
| Khamashta et al. 2016 (38)                 | Ph 2b RTC (n=431). Patients randomized to 3 doses of sifalimumab or placebo. Study duration: 52 weeks.                                                                                                                                                     | To assess efficacy, safety of sifalimumab in mod-severe SLE                                              | SRI<br>SLEDAI-2K<br>PGA<br>FACIT-F                                                  | Compared to placebo, a greater percentage of treatment group (all doses) met primary endpoint of an SRI-4                                                                         | Percentage of patients with >3-point improvement in FACIT-F was not statistically different from placebo for the treatment groups                                                                                                                       |
| Kiani et al. 2013 (39)<br>United States    | Post hoc analysis of a 2-year RTC LAPS study (n=200). Patients in a trial randomized to atorvastatin and placebo. Study duration: 24 months                                                                                                                | To identify predictors of HRQoL using SF-36 among patients with SLE                                      | SELENA-SLEDAI<br>PGA<br>SF-36                                                       | Higher PGA associated with lower SF-36 PCS (p=0.033) and MCS (p=0.031)                                                                                                            | No significant differences between treatment groups at 2 years.<br>Presence of fibromyalgia associated with lower scores in SF-36 PF (p=0.0016), RP (p=0.015), BP (0.0006), GH (p=0.0052), VT (p=0.0086), SF (p=0.042), PCS (p=0.0002)                  |
| Merrill et al. 2010a (40)<br>North America | Phase IIb randomized, double-blind, placebo-controlled trial (n=118). Patients randomized to abatacept and placebo (approx. 2:1 ratio). Study duration: 12 months                                                                                          | To evaluate abatacept in SLE and polyarthritis, discoid lesions, or pleuritis and/or pericarditis        | BILAG<br>SF-36<br>CES-D                                                             | After the steroid taper, 79.7% and 82.5% of patients in experimental and control groups had a flare. SAEs higher in the abatacept group (19.8% vs 6.8%)                           | Mean improvement from baseline to 12 months for experimental and control groups, respectively, was 6.24 and 2.32 for PCS and 5.81 and 3.57 for MCS.<br>Improvements in PCS, MCS, fatigue, and sleep scores exceeded MCID for abatacept-treated patients |
| Merrill et al. 2010b (41)<br>North America | EXPLORER RTC (n=257). Patients randomized at 2:1 ratio to IV rituximab or placebo. Study duration; 52 weeks                                                                                                                                                | To test the efficacy and safety of rituximab vs placebo in patients with moderate-severe extrarenal SLE  | BILAG<br>SF-36                                                                      | At week 52, no difference was noticed between major and partial clinical response rates in treatment groups. Also, there was no difference in disease activity between the groups | No significant difference between treatment groups in change in PCS score from baseline to week 52. Placebo (4.1 ± 17.0; 95% CI: 0.3–7.9) and rituximab 8.2 ± 22.8; 95% CI: 4.7–11.7 (p=0.1277)                                                         |

| Citation and Study Location                                                 | Study Design, Population and Intervention Description                                                                                                                                                          | Study Objectives                                                                                                              | Outcome Assessments                                                                  | Key Clinical Findings                                                                                           | PRO Findings                                                                                                                                                                                                                                                                          |
|-----------------------------------------------------------------------------|----------------------------------------------------------------------------------------------------------------------------------------------------------------------------------------------------------------|-------------------------------------------------------------------------------------------------------------------------------|--------------------------------------------------------------------------------------|-----------------------------------------------------------------------------------------------------------------|---------------------------------------------------------------------------------------------------------------------------------------------------------------------------------------------------------------------------------------------------------------------------------------|
| Navarra et al. 2011 (42)<br>Latin America, Asia-Pacific, and eastern Europe | Phase III study (n=867). Patients randomized to 1 mg/kg belimumab, 10 mg/kg belimumab (n=290), or placebo. Study duration: 52 weeks.                                                                           | To assess the efficacy and safety of fully human monoclonal antibody belimumab (BLyS-specific inhibitor) in patients with SLE | SRI<br>SF-36                                                                         | Significantly higher responder rate as assessed by SRI in 1 mg/kg (p=0.0129) and 10 mg/kg (p=0.0006) vs placebo | Both experimental groups had similar improvements in SF-36 at week 52 vs placebo (p=0.02 for both groups)                                                                                                                                                                             |
| Navarrete-Navarrete et al. 2010 (43)<br>Spain                               | Single-center RTC (n=34). Patients randomized to cognitive behavioral therapy and usual care. Study duration: 15 months.                                                                                       | To determine if cognitive behavioral therapy can improve QoL in patients with SLE                                             | STAI<br>BDI<br>SF-36<br>Other stress measures                                        | Not reported                                                                                                    | SF-36 MCS improved significantly in cognitive behavioral group compared to usual care (p<0.035). PCS showed some improvement but was not statistically significant                                                                                                                    |
| Nordmark et al. 2005 (44)<br>Sweden                                         | Two-phase trial (n=37) with initial 6-month randomized, double-blind, placebo-controlled period, follow by 6 months of open-label DHEA treatment for all patients                                              | To evaluate the efficacy of low dose DHEA on HRQoL in glucocorticoid treated SLE                                              | SF-36<br>Hopkins Symptom Check List (HSCL)<br>PGWBI<br>McCoy Sex Scale Questionnaire | DHEA treatment increased serum levels of sulphated DHEA from subnormal to normal                                | DHEA group improved in SF-36 RE and HSCL total score (both p<0.05).<br>During open treatment phase, former placebo group improved in SF-36 MH (p<0.05); improvement in HRQoL was not maintained for 12 months. Both groups improved on McCoy Sex Scale during DHEA treatment (p<0.05) |
| Petri et al. 2017 (45)<br>North and Central America, Asia-Pacific           | Ph 2 RTC (n=547). Patients were randomized to receive subcutaneous blisibimod in one of three dose levels (100 mg weekly (QW), 200 mg QW, or 200 mg every 4 weeks (Q4W)), or placebo. Study duration: 52 weeks | To evaluate the effects of blisibimod on fatigue and disease activity                                                         | SELENA-SLEDAI<br>BILAG<br>FACIT-F                                                    | Significant improvements in measures of disease activity                                                        | When compared to placebo, the effects of 100 mg or 200 mg blisibimod (QW) on fatigue were significant at various time points from week 8 to week 28 (all p<0.05) and surpassed the MCID. However, after week 28, evaluation on fatigue was confounded by lost to follow-up            |
| Strand et al. 2015 (46)<br>International                                    | Phase II randomized, controlled trial                                                                                                                                                                          | To determine efficacy of PF-04236921 in treating SLE                                                                          | SRI-4<br>SF-36<br>FACIT-F<br>EQ-5D                                                   | Not reported                                                                                                    | SF-36 PCS scores showed statistically significant improvement over placebo group. PH, BP, GH, and VT approached significance and exceeded MCID. Improvements in FACIT-F and EQ-5D exceeded MCID                                                                                       |
| Strand et al. 2014b (47)<br>International                                   | Secondary analysis of 48-week, phase II/III RCT (ALLEVIATE). Patients randomized to usual care plus epratuzumab or placebo                                                                                     | To evaluate HRQoL and corticosteroid use in patients with mod-severe SLE                                                      | BILA<br>PGA<br>PtGA<br>SF-36                                                         | No significant differences in BILAG at week 12                                                                  | Baseline PCS scores were 2-3 SDs lower than age- and gender-matched norms, and MCS scores were ≤1 SD lower. At week 48, SF-36 scores approached or exceeded normative values in BP, SF, RE, MH, and VT                                                                                |

| Citation and Study Location                         | Study Design, Population and Intervention Description                                                                                                                                                                  | Study Objectives                                                                                       | Outcome Assessments                                                | Key Clinical Findings                                                                                                                                                                                             | PRO Findings                                                                                                                                                                                                                                                                                                                                                           |
|-----------------------------------------------------|------------------------------------------------------------------------------------------------------------------------------------------------------------------------------------------------------------------------|--------------------------------------------------------------------------------------------------------|--------------------------------------------------------------------|-------------------------------------------------------------------------------------------------------------------------------------------------------------------------------------------------------------------|------------------------------------------------------------------------------------------------------------------------------------------------------------------------------------------------------------------------------------------------------------------------------------------------------------------------------------------------------------------------|
| Strand et al. 2013 (48)<br>International            | Secondary analysis of 2 P3 RCTs, BLISS-52 & BLISS-76 (52 weeks' duration; n=865 and 76 weeks' duration; n=819; respectively. Patients received placebo, or belimumab 1 or 10 mg/kg                                     | To assess effects of belimumab plus standard treatment on HRQoL in SLE patients                        | SRI<br>SF-36<br>FACIT-F<br>EQ-5D                                   | SRI rates at week 52 in BLISS-52 were significantly higher with belimumab 1 (p=0.01) and 10 (p<0.001) compared to placebo (44%)                                                                                   | In BLISS-52, mean changes from baseline to week 52 in PCS scores were significantly (p<0.05) greater with belimumab 1 and 10 vs placebo. In BLISS-76, significantly (p<0.05) greater improvements were seen with belimumab 1 in PCS and MCS scores. Significantly greater improvements in SF-36 PCS and VT and FACIT-F were evident at week 52 in both belimumab doses |
| Strand & Crawford 2005 (12)                         | Secondary analysis of two RCTs of LJP 394 (abetimus sodium). Ph 3 study, n=298 treated for 22 months. Phase 2/3 study, n=189 treated up to 18 months                                                                   | To evaluate HRQoL in clinical trials of LJP 394 (abetimus sodium) for SLE                              | SF-36                                                              | Not reported (reported previously)                                                                                                                                                                                | In Ph 3, responders improved in all SF-36 domains, with largest improvements in BP, VT, and GH (exceeded MCID). At 12 months, HRQoL was improved > MCID in ≥20% of responders in RP, BP, GH, VT                                                                                                                                                                        |
| Strand et al. 2003 (49)<br>United States and Europe | RCT (n=179) with patients randomized to LJP 394 (abetimus sodium) or placebo weekly for 16 weeks, followed by three 12-week treatment cycles of LJP 394 or placebo with 8-week intermissions. Study duration: 76 weeks | To evaluate efficacy of LJP 394 compared to placebo in SLE patients with prior renal involvement       | SF-36                                                              | Trial was prematurely discontinued after interim analysis suggested that primary endpoint would not reach significance                                                                                            | SF-36 RE increased significantly in LJP group compared placebo (p=0.01), and meets MCID (11.3 points compared to 5.3)                                                                                                                                                                                                                                                  |
| Tench et al. 2003 (50)<br>UK                        | RCT (n=93). Patients randomized to an exercise, relaxation, or a control group. Study duration: 12 weeks                                                                                                               | To evaluate the efficacy of a graded aerobic exercise program in treating fatigue in patients with SLE | FSS<br>PSQI<br>SF-36<br>HADS<br>SLAM<br>SLICC/ACR damage index     | 49% of exercise group rated "much" or "very much" better compared 28% in the relaxation and 16% in the control group (p=0.02). Fatigue improved significantly on one out of three measures after exercise therapy | There was a significant difference in the SF-36 VT between the groups, exercise mean 51 (SE=4), relaxation mean 41 (SE=4), control group mean 34 (SE=4)                                                                                                                                                                                                                |
| Uppal et al. 2009 (51)<br>Kuwait                    | Single-center, open-label pilot RCT (n=46). Patients randomized to infliximab (n=9) or standard care (n=18); n=19 healthy controls. Study duration: 6 months                                                           | To assess the safety and efficacy of infliximab in patients with active SLE.                           | SF-36<br>PtGA<br>SLEDAI<br>SLICC/ACR Damage index<br>Fatigue (VAS) | Treatment group showed significantly greater improvement in (SLEDAI) (p=0.035).                                                                                                                                   | Greater improvement in the SF-36 domains for the infliximab group compared to standard care, but not statistically significant                                                                                                                                                                                                                                         |

| Citation and Study Location                | Study Design, Population and Intervention Description                                                                                                                    | Study Objectives                                                                                                 | Outcome Assessments                         | Key Clinical Findings                                                                                                                                             | PRO Findings                                                                                                                                                                                                                                                                                                                         |
|--------------------------------------------|--------------------------------------------------------------------------------------------------------------------------------------------------------------------------|------------------------------------------------------------------------------------------------------------------|---------------------------------------------|-------------------------------------------------------------------------------------------------------------------------------------------------------------------|--------------------------------------------------------------------------------------------------------------------------------------------------------------------------------------------------------------------------------------------------------------------------------------------------------------------------------------|
| Wallace et al. 2016a (52)<br>International | Patients from a 12-week, phase IIb, EMBLEM study enrolled in open-label extension study. N=113 patients continued epratuzumab through end of open-label extension period | To assess the long-term safety of repeated courses of epratuzumab therapy in patients with moderate-severe lupus | BILAG<br>SELENA-SLEDAI<br>PGA/PtGA<br>SF-36 | TEAEs were reported in 192 patients (most common infections and infestations). Serious TEAEs were reported in 51 patients, and 14 patients had serious infections | Mean SF-36 PCS and MCS scores increased from screening to week 48, and were maintained through week 108.<br>Change from EMBLEM trial baseline (prior to open-label extension) were clinically meaningful at all time points.<br>At the last visit for each patient, 61.9% achieved change greater than MCID in PCS, and 44.1% in MCS |
| Wallace et al. 2016b (53)<br>International | Ph 2, dose-ranging, randomized, placebo-controlled trial (n=183). Patients randomized to placebo, or one of three dosages of the interleukin 6. Study duration: 24 weeks | To evaluate the safety of an interleukin 6 monoclonal antibody for the treatment of SLE                          | SRI<br>BICLA<br>SF-36<br>EQ-5D<br>FACIT-F   | SRI response rates were not significant for any dose compared to placebo                                                                                          | Mean baseline SF-36 PCS and MCS were below norms. Trends toward improvements in most SF-36 domains, PCS, FACIT-F, an EQ-5D scores were reported with 10 mg or 50 mg vs placebo at week 24. All HRQoL changes from baseline with 10 mg exceeded MCIDs                                                                                 |

Abbreviations: anti-dsDNA=anti-double-stranded deoxyribonucleic acid; BDI=Beck Depression Inventory; BICLA=BILAG-Based Composite Lupus Assessment; BILAG=British Isles Lupus Assessment Group; CB-CAP=cell-bound complement activation product; CI=confidence interval; CT=cardiovascular training; CYC=cyclophosphamide; DHEA=dehydroepiandrosterone; DSFI=Derogatis Sexual Functioning Inventory; FACIT-F=Functional Assessment of Chronic Illness Therapy-Fatigue; FSS=Fatigue Severity Scale; HADS=Hospital Anxiety and Depression Scale; HAQ=Health Assessment Questionnaire; HRQoL=health-related quality of life; HSCL=Hopkins Symptom Check List; IQOLA=International Quality of Life Assessment; IQR=interquartile ratio; LupusQoL=Lupus Quality of Life; MCID=minimal clinically important difference; MCS=mental component summary; PCS=physical component summary; PGA=Physician Global Assessment; PtGA=Patient Global Assessment; PRO=patient-reported outcome; PSQI=Pittsburgh Sleep Quality Index; QoL=quality of life; RCT=randomized controlled trial; RT=resistance training; SD=standard deviation; SELENA-SLEDAI=Safety of Estrogens in Systemic Lupus Erythematosus National Assessment – Systemic Lupus Erythematosus Disease Activity Index; SF-36=36-Item Health Survey – Short Form; SLAM-R=Systemic Lupus Activity Measure, Revised; SLAQ=Systemic Lupus Activity Questionnaire; SLEDAI=SLE Disease Activity Index; SLEDAI-2K=Systemic Lupus Erythematosus Disease Activity Index 2000; SLE=systemic lupus erythematosus; SLICC=Systemic Lupus International Collaborating Clinics; SRI=SLE Responder Index; TEAE=treatment-emergent adverse event; UK=United Kingdom; uPCR=Urine Protein to Creatine; US=United States; VO2=oxygen consumption.



**Table A3. Summary of Longitudinal Observational Studies Including SF-36, LupusQoL, and FACIT-F**

| Citation and Study Location             | Study Design Population and Interventions Description                                                                                    | Study Objectives                                                                                                      | Outcome Assessments                     | Key Clinical Findings                                                                                                                                                   | PRO Findings                                                                                                                                                                                                    |
|-----------------------------------------|------------------------------------------------------------------------------------------------------------------------------------------|-----------------------------------------------------------------------------------------------------------------------|-----------------------------------------|-------------------------------------------------------------------------------------------------------------------------------------------------------------------------|-----------------------------------------------------------------------------------------------------------------------------------------------------------------------------------------------------------------|
| Buyon et al. 2016 (54)<br>United States | Longitudinal study (n=36) among SLE patients with active disease and elevated CB-CAPs. Participants were evaluated monthly for 11 months | To evaluate relationship between CB-CAPs: EC4d, EC3d), anti-C1q, soluble complement C3/C4 and disease activity in SLE | SELENA-SLEDAI<br>SF-36                  | Decrease in SELENA-SLEDAI scores were significantly associated with reduced EC4d and EC3d levels, reduced anti-C1q titres and increased serum complement C3/C4 (p<0.05) | Increases were observed in all domains of the SF-36. Reduced EC4d or EC3d significantly associated with improvements in 6/8 domains of the SF-36; PH and RE were not significantly associated with EC4d or EC3d |
| Goharifar et al. 2015 (55)<br>Iran      | Case control observation study (n=40) of SLE patients, n=21 fasting patients, and n=19 controls.<br>Study duration: 3 months             | To evaluate the effect of Ramadan fasting on SLE patients' disease activity, HRQoL, and lipid profile                 | SELENA-SLEDAI<br>lipid profile<br>SF-36 | No significant differences in SELENA-SLEDAI scores between groups at any visit                                                                                          | Within group improvements for both groups statistically significant: SF-36 BP (p=0.002), SF (p=0.09), MH (p=0<0.001), RE (p=0.016), VT (p=0.04). No significant between-group differences                       |

Abbreviations: BP=bodily pain; FACIT-Fatigue=Functional Assessment of Chronic Illness Therapy-Fatigue; HRQoL=health-related quality of life; LIT=lupus impact tracker; LupusQoL=Lupus Quality of Life; SELENA-SLEDAI=Safety of Estrogens in Systemic Lupus Erythematosus National Assessment – Systemic Lupus Erythematosus Disease Activity Index; SF=social functioning; SF-36=36-Item Health Survey – Short Form; SLE=systemic lupus erythematosus; SLEDAI=SLE Disease Activity Index.



## Appendix References

- (1) Baba S, Katsumata Y, Okamoto Y, Kawaguchi Y, Hanaoka M, Kawasumi H, et al. Reliability of the SF-36 in Japanese patients with systemic lupus erythematosus and its associations with disease activity and damage: a two-consecutive year prospective study. *Lupus*. 2018;27:407-416.
- (2) Thumboo J, Feng PH, Boey ML, Soh CH, Thio S, Fong KY. Validation of the Chinese SF-36 for quality of life assessment in patients with systemic lupus erythematosus. *Lupus*. 2000;9:708-712.
- (3) Thumboo J, Fong KY, Ng TP, Leong KH, Feng PH, Thio ST, et al. Validation of the MOS SF-36 for quality of life assessment of patients with systemic lupus erythematosus in Singapore. *J Rheumatol*. 1999;26:97-102.
- (4) Nantes SG, Strand V, Su J, Touma Z. Comparison of the sensitivity to change of the 36-item Short Form Health Survey and the Lupus Quality of Life Measure using various definitions of minimum clinically important differences in patients with active systemic lupus erythematosus. *Arthritis Care Res*. 2018;70:125-133.
- (5) McElhone K, Abbott J, Shelmerdine J, et al. Development and validation of a disease-specific health-related quality of life measure, the LupusQoL, for adults with systemic lupus erythematosus. *Arthritis Rheum*. 2007;57:972-979.
- (6) Yilmaz-Oner S, Oner C, Dogukan FM, Moses TF, Demir K, Tekayev N, et al. Health-related quality of life assessed by LupusQoL questionnaire and SF-36 in Turkish patients with systemic lupus erythematosus. *Clin Rheumatol*. 2016;35:617-622.
- (7) García-Carrasco M, Mendoza-Pinto C, Cardiel MH, Méndez-Martínez S, García-Villaseñor A, Jiménez-Hernández C, et al. Health related quality of life in Mexican

women with systemic lupus erythematosus: a descriptive study using SF-36 and LupusQoL. *Lupus*. 2012;21:1219-1224.

(8) Wolfe F, Michaud K, Li T, Katz RT. EQ-5D and SF-36 quality of life measures in systemic lupus erythematosus: comparisons with rheumatoid arthritis, noninflammatory rheumatic disorders, and fibromyalgia. *J Rheumatol*. 2010;37:296-304.

(9) Touma Z, Gladman DD, Ibanez D, Urowitz MB. Is there an advantage over SF-36 with a quality of life measure that is specific to systemic lupus erythematosus? *J Rheumatol*. 2011;38:1898-1905.

(10) Hanly JG, Urowitz MB, Jackson D, Bae SC, Gordon C, Wallace DJ, et al. SF-36 summary and subscale scores are reliable outcomes of neuropsychiatric events in SLE system lupus erythematosus. *Ann Rheum Dis*. 2011;70:961-967.

(11) Colangelo KJ, Pope JE, Peschken C. The minimally important difference for patient reported outcomes in systemic lupus erythematosus including the HAQ-DI, pain, fatigue, and SF-36. *J Rheumatol*. 2009;36:2231-2237.

(12) Strand V, Crawford B. Improvement in health-related quality of life in patients with SLE following sustained reductions in anti-dsDNA antibodies. *Expert Rev of Pharmacoecon Outcomes Res*. 2005;5:317-326.

(13) McElhone K, Abbott J, Sutton C, Mullen M, Lanyon P, Rahman A, et al. Sensitivity to change and minimal important differences of the LupusQoL in patients with systemic lupus erythematosus. *Arthritis Care Res*. 2016;68:1505-1513.

(14) Devilliers H, Amoura Z, Besancenot JF, Bonnette B, Pasquali JL, Wahl D, et al. Responsiveness of the 36-item Short Form Health Survey and the Lupus Quality of Life Questionnaire in SLE. *Rheumatology*. 2015;54:940-949.

- (15) Meseguer-Henarejos AB, Gascón-Cánovas JJ, López-Pina JA. Components of quality of life in a sample of patients with lupus: a confirmatory factor analysis and Rasch modeling of the LupusQoL. *Clin Rheumatol*. 2017;36(8):1789-1795.
- (16) Anindito B, Hidayat R, Koesnoe S, Dewiasty E. Validity and reliability of Lupus Quality of Life Questionnaire in patients with systemic lupus erythematosus in Indonesia. *Indones J Rheumatol*. 2016;8(2).
- (17) Jolly M, Pickard AS, Wilke C, Mikolaitis RA, Teh LS, McElhone K, et al. Lupus-specific health outcome measure for US patients: the LupusQoL-US version. *Ann Rheum Dis*. 2010;69:29–33.
- (18) Lai JS, Beaumont JL, Ogale S, Brunetta P, Cella D. Validation of the functional assessment of chronic illness therapy-fatigue scale in patients with moderately to severely active systemic lupus erythematosus, participating in a clinical trial. *J Rheumatol*. 2011;38:672-679.
- (19) Goligher EC, Pouchot J, Brant R, Kherani RB, Avña-Zubieta JA, Lacaille D, et al. Minimal clinically important difference for 7 measures of fatigue in patients with systemic lupus erythematosus. *J Rheumatol*. 2008;35:635-642.
- (20) Abrahão MI, Gomiero AB, Peccin MS, Grande AJ, Trevisani VF. Cardiovascular training vs. resistance training for improving quality of life and physical function in patients with systemic lupus erythematosus: a randomized controlled trial. *Scand J Rheumatol*. 2016;45(3):197-201.
- (21) Arriens C, Hynan LS, Lerman RH, Karp DR, Mohan C. Placebo-controlled randomized clinical trial of fish oil's impact on fatigue, quality of life, and disease activity in Systemic Lupus Erythematosus. *Nutr J*. 2015;14:82.
- (22) Boström C, Elfving B, Dupré B, Opava CH, Lundberg IE, Jansson E. Effects

of a one-year physical activity programme for women with systemic lupus erythematosus - A randomized controlled study. *Lupus*. 2016;25:602-616.

(23) Cardiel MH, Tumlin JA, Furie RA, Wallace DJ, Joh T, Linnik MD. Abetimus sodium for renal flare in systemic lupus erythematosus: Results of a randomized, controlled phase III trial. *Arthritis Rheum*. 2008;58:2470-2480.

(24) Clowse MEB, Wallace DJ, Furie RA, et al. Efficacy and Safety of Epratuzumab in Moderately to Severely Active Systemic Lupus Erythematosus: Results From Two Phase III Randomized, Double-Blind, Placebo- Controlled Trials. *Arthritis Rheumatol*. 2017;69:362-375.

(25) Danowski A, Magder L, Petri M. Flares in Lupus: Outcome Assessment Trial (FLOAT), a comparison between oral methylprednisolone and intramuscular triamcinolone. *J Rheumatol*. 2006;33:57-60.

(26) Dobkin PL, Da Costa D, Joseph L, et al. Counterbalancing patient demands with evidence: results from a pan-Canadian randomized clinical trial of brief supportive-expressive group psychotherapy for women with systemic lupus erythematosus. *Ann Behav Med*. 2002;24:88-99.

(27) Dussan KB, Magder L, Brodsky RA, Jones RJ, Petri M. High dose cyclophosphamide performs better than monthly dose cyclophosphamide in quality of life measures. *Lupus*. 2008;17:1079-1085.

(28) Fiechtner JJ, Montroy T. Treatment of moderately to severely active systemic lupus erythematosus with adrenocorticotrophic hormone: a single-site, open-label trial. *Lupus*. 2014;23:905-912.

(29) Fortin PR, Abrahamowicz M, Ferland D, et al. Steroid-sparing effects of methotrexate in systemic lupus erythematosus: a double-blind, randomized,

placebo-controlled trial. *Arthritis Rheum.* 2008;59:1796-1804.

(30) Furie R, Khamashta M, Merrill JT, et al. Anifrolumab, an Anti-Interferon- $\alpha$  Receptor Monoclonal Antibody, in Moderate-to-Severe Systemic Lupus Erythematosus. *Arthritis Rheum.* 2017;69:376-386.

(31) Furie R, Petri M, Zamani O, et al. A phase III, randomized, placebo-controlled study of belimumab, a monoclonal antibody that inhibits B lymphocyte stimulator, in patients with systemic lupus erythematosus. *Arthritis Rheum.* 2011;63:3918-3930.

(32) Furie R, Stohl W, Ginzler EM, Becker M, Mishra N, Chatham W, et al. Biologic activity and safety of belimumab, a neutralizing anti-B-lymphocyte stimulator (BLyS) monoclonal antibody: a phase 1 trial in patients with systemic lupus erythematosus. *Arthritis Res Ther.* 2008;10(5): R109.

(33) Gordon C, Wallace DJ, Shinada S, et al. Testosterone patches in the management of patients with mild/moderate systemic lupus erythematosus. *Rheumatology (Oxford).* 2008;17:334-338.

(34) Greco CM, Kao AH, Maksimowicz-McKinnon K, et al. Acupuncture for systemic lupus erythematosus: a pilot RCT feasibility and safety study. *Lupus.* 2008;17;1108-1116.

(35) Hartkamp A, Geenen R, Godaert GL, Bijl M, Bijlsma JW, Derksen RH. Effects of dehydroepiandrosterone on fatigue and well-being in women with quiescent systemic lupus erythematosus: a randomised controlled trial. *Ann Rheum Dis.* 2010;69;1144-1147.

(36) Jolly M, Galicier L, Aumaître O, et al. Quality of life in systemic lupus erythematosus: description in a cohort of French patients and association with blood hydroxychloroquine levels. *Lupus.* 2016;25:735-740.

- (37) Karlson EW, Liang MH, Eaton H, et al. A randomized clinical trial of a psychoeducational intervention to improve outcomes in systemic lupus erythematosus. *Arthritis Rheum.* 2004;50:1832-1841.
- (38) Khamashta M, Merrill JT, Werth VP, et al. Sifalimumab, an anti-interferon- $\alpha$  monoclonal antibody, in moderate-to-severe systemic lupus erythematosus: a randomised, double-blind, placebo-controlled study. *Ann Rheum Dis.* 2016;75:1909-1916.
- (39) Kiani AN, Strand V, Fang H, Jaranilla J, Petri M. Predictors of self-reported health-related quality of life in systemic lupus erythematosus. *Rheumatology (Oxford).* 2013;52:1651-1657.
- (40) Merrill JT, Burgos-Vargas R, Westhovens R, et al. The efficacy and safety of abatacept in patients with non-life-threatening manifestations of systemic lupus erythematosus: results of a twelve-month, multicenter, exploratory, phase IIb, randomized, double-blind, placebo-controlled trial. *Arthritis Rheum.* 2010a;62:3077-3087.
- (41) Merrill JT, Neuwelt CM, Wallace DJ, et al. Efficacy and safety of rituximab in moderately-to-severely active systemic lupus erythematosus: the randomized, double-blind, phase II/III systemic lupus erythematosus evaluation of rituximab trial. *Arthritis Rheum.* 2010b;62:222-233.
- (42) Navarra SV, Guzmán RM, Gallaher AE, et al. Efficacy and safety of belimumab in patients with active systemic lupus erythematosus: a randomised, placebo controlled, phase 3 trial. *Lancet.* 2011;377:721-731.
- (43) Navarrete-Navarrete N, Peralta-Ramirez MI, Sabio JM, Martinez-Egea I, Santos-Ruiz A, Jiménez-Alonso J. Quality-of-life predictor factors in patients with

SLE and their modification after cognitive behavioural therapy. *Lupus*. 2010;19:1632-1639.

(44) Nordmark G, Bengtsson C, Larsson A, Karlsson FA, Sturfelt G, Rönnblom L. Effects of dehydroepiandrosterone supplement on health-related quality of life in glucocorticoid treated female patients with systemic lupus erythematosus. *Autoimmunity*. 2005;38:531-540.

(45) Petri MA, Martin RS, Scheinberg MA, Furie RA. Assessments of fatigue and disease activity in patients with systemic lupus erythematosus enrolled in the Phase 2 clinical trial with blisibimod. *Lupus*. 2017;26:27-37.

(46) Strand V, Diehl A, Christensen J, Wajdula J, Sridharan S, Healey PJ. Improvements in health-related quality of life and fatigue following administration of an IL-6 monoclonal antibody (PF-04236921) in an enriched population of subjects with active SLE [abstract]. *Arthritis Rheumatol*. 2015;67 (suppl 10).

(47) Strand V, Petri M, Kalunian K, Gordon D, Wallace DJ, Hobbs K, et al. Epratuzumab for patients with moderate to severe flaring SLE: health-related quality of life outcomes and corticosteroid use in the randomized controlled ALLEVIATE trials and extension study SL0006. *Rheumatology (Oxford)*. 2014; 53(3):502-511.

(48) Strand V, Galateanu C, Phushparajah DS, Nikai E, Sayers J, Wood R, van Vollenhoven RF. Limitations of current treatments for systemic lupus erythematosus: a patient and physician survey. *Lupus*. 2013;22:819-826.

(49) Strand V, Aranow C, Cardiel MH, et al. Improvement in health-related quality of life in systemic lupus erythematosus patients enrolled in a randomized clinical trial comparing LJP 394 treatment with placebo. *Lupus*. 2003;12:677-686.

- (50) Tench CM, McCarthy J, McCurdie I, White PD, D'Cruz DP. Fatigue in systemic lupus erythematosus: a randomized controlled trial of exercise. *Rheumatology*. 2003;42;1050-1054.
- (51) Uppal SS, Hayat SJ, Raghupathy R. Efficacy and safety of infliximab in active SLE: a pilot study. *Lupus*. 2009;18;690-697.
- (52) Wallace DJ, Hobbs K, Clowse MEB, et al. Long-term safety and efficacy of epratuzumab in the treatment of moderate-to- severe systemic lupus erythematosus: Results from an open-label extension study. *Arthritis Care and Res*. 2016a;68:534-543.
- (53) Wallace DJ, Strand V, Merrill JT, Popa S, Spindler AJ, Eimon A, et al. Efficacy and safety of an interleukin-6 monoclonal antibody for the treatment of systemic lupus erythematosus: a phase 2 dose-ranging randomised controlled trial. *Ann Rheum Dis*. 2016b;76:3.
- (54) Buyon J, Furie R, Putterman C, et al. Reduction in erythrocyte-bound complement activation products and titres of anti-C1q antibodies associate with clinical improvement in systemic lupus erythematosus. *Lupus Sci. Med*. 2016;3(1).
- (55) Goharifar H, Faezi ST, Paragomi P, et al. The effect of Ramadan fasting on quiescent systemic lupus erythematosus (SLE) patients' disease activity, health quality of life and lipid profile: a pilot study. *Rheumatol Intl*. 2015;35:1409-1414.
